# Supplementary material for: 4,4′,5,5′-Tetraamino-3,3′-azo-bis-1,2,4-triazole and the electrosynthesis of high-performing insensitive energetic materials
Source: Royal Society of Chemistry journal article supplement (doi:10.1039/d0ta05360k), 2020-01-01
Supplement: d0ta05360k1.pdf [file d0ta05360k1.pdf]

## 4,4',5,5'-tetraamino-3,3'-azo-bis-1,2,4-triazole and the electrosynthesis of high-performing insensitive energetic materials

Joseph R. Yount <sup>[a]</sup>, Matthias Zeller <sup>[c]</sup>, Edward F.C. Byrd <sup>[d]</sup> & Davin G. Piercey.\*<sup>[a][b]</sup>

---

[a] J. R. Yount, Prof. Dr. D.G. Piercey,  
Department of Materials Engineering, Purdue Energetics Research Center  
Purdue University  
205 Gates Road, West Lafayette, IN 47907, USA  
E-mail: dpiercey@purdue.edu

[b] Prof. Dr. D.G. Piercey,  
Department of Mechanical Engineering, Purdue Energetics Research Center  
Purdue University  
205 Gates Road, West Lafayette, IN 47907, USA

[c] Dr. M. Zeller,  
Department of Chemistry  
Purdue University  
560 Oval Drive West Lafayette, IN 47907, USA U.S.

[d] Dr. E.F.C Byrd,  
Army Research Laboratory,  
Aberdeen Proving Ground, MD 21005, USA

### 1. Methods

**General:** All reagents and solvents were used as received (Sigma– Aldrich, Fluka, Acros Organics, Fisher Scientific Co LLC) if not stated otherwise. Guanazine, 5-nitrimino-1,2,3,4-tetrazole and 5-nitro-1,2,3,4-tetrazole were prepared according to literature.<sup>1,2,3</sup> Melting and decomposition points were measured with a TA Instruments SDT Q600 TGA/ DSC using heating rates of 10 K·min<sup>-1</sup>. <sup>1</sup>H and <sup>13</sup>C NMR spectra were measured using Bruker AV-III-400-HD (5 mm BBFO SmartProbe) and Bruker AV-III-500-HD (5 mm BBFO Cryoprobe Prodigy) Avance DRX NMR spectrometers. All chemical shifts are quoted in ppm relative to TMS (1 H, 13C). Infrared spectra were measured using a Perkin– Elmer Spectrum Two FT-IR spectrometer. Transmittance values are described as “strong” (s), “medium” (m) and “weak” (w). Mass spectra were measured with an Agilent 1260 Infinity II Quaternary LC instrument. Elemental analysis was performed using the Vario EL cube – Elemental Analyzer. Sensitivity data were determined using a BAM friction tester (Reichel & Partner GmbH) and OZM drophammer. CV and electrolysis experiments were performed using an IKA Electrosyn 2.0.<sup>4</sup>

**CAUTION!** The described compounds 2-7 are energetic materials with sensitivity to various

stimuli. While we encountered no issues in the handling of these materials, proper protective measures (face shield, ear protection, body armor, Kevlar gloves, and earthed equipment) should be used at all times.

### **General Procedures for CV**

Cyclic voltammograms (CV) were taken using an IKA ElectroSyn 2.0 instrument equipped with an Ag/AgCl reference electrode, a 3mm glassy carbon working electrode, and a carbon counter electrode. The glassy carbon working electrode was polished prior to each run using a procedure outlined by Dempsey *et al.*<sup>5</sup> Solutions were purged with Ar gas prior to each run to remove oxygen. Ar gas was purged over the top of the solution to keep a blanket during the runs. CV experiments were performed at variable scan rates and over multiple cycles. Electrolysis of guanazine was carried out using a two-electrode set up on an ElectroSyn 2.0. All electrolysis experiments were performed under constant potential conditions using a carbon (580 cm<sup>2</sup>) working and Pt foil (232 cm<sup>2</sup>) counter electrode.

After electrolysis all solutions were sonicated to create a slurry and then transferred to a falcon tube with minimal water. The slurry was centrifuged at 4000 rpms for 10 minutes. The supernatant was removed, and product was washed with water to remove unreacted guanazine and electrolyte. The supernatant collected was monitored using LC-MS to determine the number of washes necessary to remove excess guanazine and electrolyte. It was found that a single wash with 30 mL of milli-pure DI water was adequate to attain a pure sample. The concentrated solid was dried under an airline and kept in a desiccator to remove adsorbed water.

### **General Procedures for X-ray crystallographic data collection**

Data for single crystals of compounds **2a**•H<sub>2</sub>O, **2b**•H<sub>2</sub>O, **3**, **4**•H<sub>2</sub>O, **5**•H<sub>2</sub>O, and **7** were collected using a Bruker Quest diffractometer with a fixed chi angle, a Mo K $\alpha$  wavelength ( $\lambda = 0.71073 \text{ \AA}$ ) sealed tube fine focus X-ray tube, a single crystal curved graphite incident beam

monochromator, and either a Photon100 (**2a**•H<sub>2</sub>O, **2b**•H<sub>2</sub>O, **4**•H<sub>2</sub>O, **5**•H<sub>2</sub>O, **7**) or a Photon2 CMOS area detector (**3**). Data for single crystals of compounds **5**, **6**•4H<sub>2</sub>O and **6**•MeOH •0.5C<sub>4</sub>H<sub>8</sub>N<sub>12</sub> were collected using a Bruker Quest diffractometer with kappa geometry, a Cu K $\alpha$  wavelength ( $\lambda = 1.54178 \text{ \AA}$ ) I- $\mu$ -S microsource X-ray tube, laterally graded multilayer (Goebel) mirrors for monochromatization, and a Photon2 CMOS area detector. Both instruments were equipped with an Oxford Cryosystems low temperature device and examination and data collection were performed at 150 K. Data were collected, reflections were indexed and processed, and the files scaled and corrected for absorption using APEX3, SAINT and SADABS or TWINABS.<sup>6,7</sup> The space groups were assigned and the structures were solved by direct methods using XPREP within the SHELXTL suite of programs and refined by full matrix least squares against  $F^2$  with all reflections using Shelxl2018 using the graphical interface Shelxle.<sup>8,9</sup>

#### **(1) 3,4,5-triamino-1,2,4-triazole**

Was synthesized according to the literature procedure.<sup>36</sup> <sup>1</sup>H NMR (dms<sub>o</sub>-d<sub>6</sub>)  $\delta$ (ppm)=5.15(s, 2H), 5.03 (s, 4H); <sup>13</sup>C NMR (dms<sub>o</sub>-d<sub>6</sub>)  $\delta$ (ppm)=151.31(2C)

#### **(2) 4,4',5,5'- tetra-amino-3,3'-azo bis-1,2,4-triazole (TAABT)**

200 mg of guanazine in 10 mL of 0.1 M (NH<sub>4</sub>)<sub>2</sub>CO<sub>3(aq)</sub> was electrolyzed at 2.5 V in a single compartment cell using a carbon (580 cm<sup>2</sup>) working and Pt foil (232 cm<sup>2</sup>) counter electrode until 2 F/mol of charge was passed. The slurry was then sonicated, centrifuged, washed three times to remove excess precursor. The sample was then dried in a desiccator over P<sub>2</sub>O<sub>5</sub> to yield 4,4',5,5' tetra-amino-3,3'-azo bis-1,2,4-triazole monohydrate **2**•H<sub>2</sub>O at 40.2% yield.

<sup>13</sup>C NMR (dms<sub>o</sub>-d<sub>6</sub>)  $\delta$ (ppm)=157.53(2C), 156.07(2C); <sup>1</sup>H NMR (dms<sub>o</sub>-d<sub>6</sub>)  $\delta$ (ppm)= 6.43(s, 4H), 5.86(s, 4H); EA: (C<sub>4</sub>H<sub>8</sub>N<sub>12</sub>•H<sub>2</sub>O, 242.2020 g/mol) calcd: 69.40 % N, 19.84 % C, 4.16% H, found: 66.23% N, 19.22% C, 4.48% H; DSC (10°C min<sup>-1</sup>) T<sub>Dec</sub> at 291°C; IR (cm<sup>-1</sup>)  $\nu = 3289.78(w)$ , 3111.19(w), 1564.64(s), 1546.94(s), 1448.94(s), 1375.87(w), 1274.40(w), 1072.02(s), 956.93(s), 826.14(w), 809.45(w), 749.87(m), 619.94(s), 548.52(m); MS (MALDI): m/z: 226.2 (C<sub>4</sub>H<sub>10</sub> N<sub>12</sub><sup>2+</sup>); BAM impact: >40J; BAM friction >360N.

100 mg of TAABT•H<sub>2</sub>O was added to a 25mL round bottom flask and placed onto a high vacuum Schlenk line. The sample was placed under < 1 mbar pressures while being heated at 90 °C overnight. The dried sample was identified as anhydrous TAABT by elemental analysis (100% yield).

<sup>13</sup>C NMR (dms<sub>o</sub>-d<sub>6</sub>) δ(ppm)=157.53(2C), 156.07(2C); <sup>1</sup>H NMR (dms<sub>o</sub>-d<sub>6</sub>) δ(ppm)= 6.43(s, 4H), 5.86(s, 4H); EA: (C<sub>4</sub>H<sub>8</sub>N<sub>12</sub>, 224.19 g/mol) calcd: 74.9734% N, 21.4298% C, 3.5968% H, found: 74.94% N, 22.09% C, 4.00% H; DSC (10°C min<sup>-1</sup>) T<sub>Dec</sub> at 302 °C; IR (cm<sup>-1</sup>) ν =3297.75(w), 3075.30(w), 1645.34(m), 1540.12(m), 147.75(m), 1376.01(w), 1322.53(w), 121.00(w), 1066.54(s), 960.86(m), 815.72(m), 760.28(m), 724.80(m), 692.55(m), 615.42(m), 541.92(m), 464.87(w); BAM impact: >40J; BAM friction >360N.

### **(3) 4,4',5,5' tetra-amino-3,3'-azo bis-1,2,4-triazolium dinitrate**

1.338 g (0.014 mol) of concentrated (15.8M) nitric acid was added to a beaker containing 100 mg (0.00041mol) of TAABT•H<sub>2</sub>O in DI H<sub>2</sub>O, representing a 34 mol eq. of HNO<sub>3</sub>. The solution was stirred at room temperature until TAABT was fully dissolved. The solution was then allowed to slowly evaporate yielding orange crystals. After filtration and drying 103 mg of sample was collected (86.8% yield).

<sup>13</sup>C NMR (DMSO-d<sub>6</sub>) δ(ppm)= 154.91(2C), 152.56(2C); <sup>1</sup>H NMR (DMSO-d<sub>6</sub>) δ(ppm)= 8.27(s, 2H), 6.31(broad s, 5H); EA: (C<sub>4</sub>H<sub>10</sub>N<sub>12</sub>•2(NO<sub>3</sub>), 350.21g/mol) calcd: 55.99% N, 13.72% C, 2.88% H, found 56.53% N, 13.59% C, 2.93% H. DSC (10°C min<sup>-1</sup>): 234 °C (T<sub>Dec, onset</sub>); IR (cm<sup>-1</sup>) ν = 3347.85(w), 3103.20(w), 1687.75 (m), 1601.32(w), 1532(w), 1433.87(m), 1313.47(s), 1255.92(m), 1128.10(m), 1069.85(w), 1040.09(m), 972.61(w), 859.61(w), 804.75(m), 713.88(w), 664.32(m); MS (ESI +): m/z: 225.2 (C<sub>4</sub>H<sub>9</sub>N<sub>12</sub><sup>+</sup>); MS (ESI-):m/z: 62.1 (NO<sub>3</sub><sup>-</sup>); BAM impact: <1 J; BAM friction 64-80 N.

### **(4) 4,4',5,5' tetra-amino-3,3'-azo bis-1,2,4-triazolium nitrate**

97 mg of TAABT•H<sub>2</sub>O was combined with 43 mg of conc. HNO<sub>3</sub> (1.12 mol eq.) in 20 mL of DI water. This slurry was stirred at room temperature for 3 days yielding a light orange slurry. The

mixture was then filtered and washed with 2-propanol. This was then recrystallized in water yielding the monohydrate mononitrate **4•H<sub>2</sub>O**. The remaining salt was then dried under high vacuum (< 1 mbar) on a Schlenk over night while being heated at 90 °C. The isolated product was identified as anhydrous **4**. No product was lost during drying, so yield was assumed to be 100%. The sample was removed from the vacuum, sealed with parafilm, and stored in a desiccator prior to use.

<sup>13</sup>C NMR (DMSO-d<sub>6</sub>) δ(ppm)= 155.53(4C); <sup>1</sup>H NMR (DMSO-d<sub>6</sub>) δ(ppm)= 7.78(s, 4H), 6.16(broad s, 4H); EA: (C<sub>4</sub>H<sub>9</sub>N<sub>12</sub>•NO<sub>3</sub>, 287.1996 g/mol) calcd: 63.40% N, 16.73% C, 3.16% H, found 63.33% N, 16.93% C, 3.83% H; DSC (10°C min<sup>-1</sup>) T<sub>Dec</sub> at 230 °C; IR (cm<sup>-1</sup>) ν = 3428.72(w), 3319.78(w), 3152.04(w), 1685.75(m), 1629.69(m), 1542.43(w), 1501.71(m), 1389.36(m), 1348.91(m), 1309.38(s), 1278.24(m), 1133.22(w), 1105.27(s), 1022.38(m), 893.59(w), 824.50(m), 767.03(w), 731.43(w), 691.73(w), 567.92(m); BAM impact: >40J; BAM friction >360N.

#### **(5) 4,4',5,5' tetra-amino-3,3'-azo bis-1,2,4-triazolium perchlorate**

203 mg of TAABT was combined with a 1.72 mol eq. of 60% HClO<sub>4</sub> (240 mg) in water. The solution was stirred with heat until the azo complex was completely dissolved. The solution was allowed to slowly evaporate yielding red crystals of the monohydrate **5•H<sub>2</sub>O**. DSC and elemental analysis results show a loss of the water of hydration. After filtration and drying in dessicator, 184 mg of light orange crystals of anhydrous **5** were collected (67.6% yield). The crystal structure of anhydrous **5** was determined by single crystal x-ray diffraction re-crystallization in MeOH.

<sup>13</sup>C NMR (DMSO-d<sub>6</sub>) δ(ppm)= 155.54(4C); <sup>1</sup>H NMR (DMSO-d<sub>6</sub>) δ(ppm)= 7.80(s, 4H), 6.04(broad s, 4H); EA: (C<sub>4</sub>H<sub>9</sub>N<sub>12</sub>•ClO<sub>4</sub>, 324.6453g/mol) calcd: 51.77% N, 14.80% C, 2.79% H, found: 51.79% N, 14.46% C, 2.72% H; DSC (10°C min<sup>-1</sup>) 254 °C (T<sub>Dec, onset</sub>); IR (cm<sup>-1</sup>) ν = 3459.68(w), 3361.38(w), 3324.09(m), 1662.50(m), 1606.98(m), 1527.13(w), 1358.92(w), 1069.95(s), 975.40(m), 864.14(m), 764.30(m), 720.7(m), 620.46(s); MS (ESI +): m/z: 225.2 (C<sub>4</sub>H<sub>9</sub>N<sub>12</sub><sup>+</sup>); MS (ESI-):m/z: 99.1 (ClO<sub>4</sub><sup>-</sup>); BAM impact: <1 J; BAM friction 128 N.

**(6) 4,4',5,5' tetra-amino-3,3'-azo bis-1,2,4-triazolium 5-nitrimino-1,2,3,4-tetrazolate monohydrate**

An equal molar solution of 5-nitriminotetrazole (162 mg) and TAABT (200 mg) in 100 mL of milli-pore water was heated at 70 °C until the solution became clear. The solution was then allowed to slowly evaporate and crystallize to yield fine red needle crystals of compound **6•4H<sub>2</sub>O** in the form of the tetrahydrate as confirmed by X-ray diffraction. DSC and elemental analysis results show a loss of 3 waters of hydration yielding the monohydrate salt. After filtration and drying in a desiccator over P<sub>2</sub>O<sub>5</sub> 218 mg of monohydrate **10** were collected (70.8% yield). The crystal structure of **6•MeOH •0.5C<sub>4</sub>H<sub>8</sub>N<sub>12</sub>** a cocrystal of **6•MeOH** with unprotonated (**2**) was determined by single crystal x-ray diffraction as its monomethanol solvate.

<sup>1</sup>H NMR (DMSO-d<sub>6</sub>) δ(ppm)= 7.77(s, 4H), 6.04( s, 4H); EA: (C<sub>4</sub>H<sub>9</sub>N<sub>12</sub>•CN<sub>5</sub>O<sub>2</sub>•H<sub>2</sub>O, 372.27 g/mol) calcd: 67.73% N, 16.13% C, 3.25% H, found: 67.48% N, 16.14% C, 3.36% H; DSC (10°C min<sup>-1</sup>) 219 °C (T<sub>Dec, onset</sub>); IR (cm<sup>-1</sup>) ν =3560.35(w), 3019.19(w), 1704.98(m), 1647.53(m), 1533.38(m), 1431.87(m), 1368.20(w), 1313.99(s), 1270.93(m), 1221.44(m), 1095.24(m), 1071.99(m), 1042.95(m), 966.49(m), 649.95(m), 533.67(s), 473.04(s); MS (ESI +): m/z: 225.2 (C<sub>4</sub>H<sub>9</sub>N<sub>12</sub><sup>+</sup>); MS (ESI-):m/z: 129.1 (CHN<sub>6</sub>O<sub>2</sub><sup>-</sup>); BAM impact: >40 J; BAM friction >360 N.

**(7) 4,4',5,5' tetra-amino-3,3'-azo bis-1,2,4-triazolium di-5-nitro-1,2,3,4-tetrazolate**

A molar excess of sodium 5-nitrotetrazolate salt was prepared in aqueous solution and acidified to pH ~1 with concentrated sulfuric acid. This was then extracted with 7 x 40 mL of ethyl acetate. The combined ethyl acetate washes were added to a slurry of 200 mg of TAABT in 100 mL of millipore water. The solution was stirred under an airline to remove excess ethyl acetate until all remaining ethyl acetate had fully evaporated combining the 5-nitrotetrazole and TAABT in the remaining solvent. The solution was heated at 70 °C with stirring to fully dissolve TAABT. Only slight heating was required due to the strong acidity of 5-nitrotetrazolate. The solution was then allowed to slowly evaporate and crystallize. After filtration and drying in a desiccator over P<sub>2</sub>O<sub>5</sub> 244 mg of salt were collected. (64.5% yield)

$^{13}\text{C}$  NMR (DMSO- $d_6$ )  $\delta$ (ppm)= 154.96(2C), 154.63(2C);  $^1\text{H}$  NMR (DMSO- $d_6$ )  $\delta$ (ppm)= 8.25(s, 2H), 6.21(broad s, 5H); EA: ( $\text{C}_6\text{H}_{10}\text{N}_{22}\text{O}_4 \cdot 2(\text{CN}_5\text{O}_2)$ ), 454.29 g/mol) calcd: 67.83% N, 15.86% C, 2.22% H, found: 69.12% N, 15.91% C, 2.24% H; DSC ( $10^\circ\text{C min}^{-1}$ )  $240^\circ\text{C}$  ( $T_{\text{Dec, onset}}$ ); IR ( $\text{cm}^{-1}$ )  $\nu$ =3349.00(w), 3059.87(w), 2691.81(w), 1696.20(s), 1634.97(w), 1537.78(m), 1446.88(m), 1423.48(s), 1372.48(m), 1321.94(s), 1281.68(m), 1182.51(s), 1161.77(s), 1143.14(m), 1082.49(m), 1034.77(w), 979.20(s), 838.95(s), 798.49(m), 765.05(m), 765.05(m), 664.37(m), 636.26(m), 535.05(s), 571.56(s), 458.66(m); MS (ESI +): m/z: 225.2 ( $\text{C}_4\text{H}_9\text{N}_{12}^+$ ); MS (ESI-):m/z: 114.1 ( $\text{CN}_5\text{O}_2^-$ ); BAM impact:  $>40$  J; BAM friction 116 N.

## **2. X-ray diffraction**

For general procedures, see Methods section.

### ***Hydrogen Atom Treatment***

For compounds **2a**• $\text{H}_2\text{O}$ , **2b**• $\text{H}_2\text{O}$ , **3**, **5**• $\text{H}_2\text{O}$ , **5** and **7** H atoms were located from difference density Fourier maps and their positions and isotropic displacement parameters were freely refined. For **5**, amine N-H bonds were restrained to be similar in length. In **5**, the ammonium H atom is located on a two-fold axis and is shared between two symmetry equivalent N atoms. In compounds **4**• $\text{H}_2\text{O}$ , **6**• $4\text{H}_2\text{O}$  and **6**• $\text{MeOH C}_4\text{N}_{12}\text{H}_8$ , H atoms attached to  $\text{sp}^2$  hybridized nitrogen atoms were positioned geometrically and constrained to ride on their parent atoms with N-H bond distances constrained to 0.88 Å. All other N-bound H atoms were located from difference density Fourier maps and refined and N-H bond distances were restrained to 0.88(2) Å. In **4**• $\text{H}_2\text{O}$ , H···H distances in  $\text{NH}_2$  groups were restrained to a target value of 1.36(2) Å.  $\text{CH}_3$  C-H bond distances were constrained to 0.98 Å, alcohol O-H distances to 0.84 Å. Methyl  $\text{CH}_3$  and hydroxyl H atoms were allowed to rotate but not to tip to best fit the experimental electron density. Water O-H distances were restrained to 0.84(2) and H···H distances to 1.36(2) Å.  $U_{\text{iso}}(\text{H})$  values for **4**• $\text{H}_2\text{O}$ , **6**• $4\text{H}_2\text{O}$  and **6**• $\text{MeOH C}_4\text{N}_{12}\text{H}_8$  were

set to a multiple of  $U_{eq}(C/N/O)$  with 1.5 for  $CH_3$ ,  $NH_3^+$  and  $OH$ , and 1.2 for  $N-H^+$ ,  $N-H$  and  $NH_2$  units, respectively.

**Single Crystal XRD data for 4,4',5,5' tetra-amino-3,3'-azo bis-1,2,4-triazole monohydrate ( $TAABT \cdot H_2O$ ) ( $2a \cdot H_2O$ )**

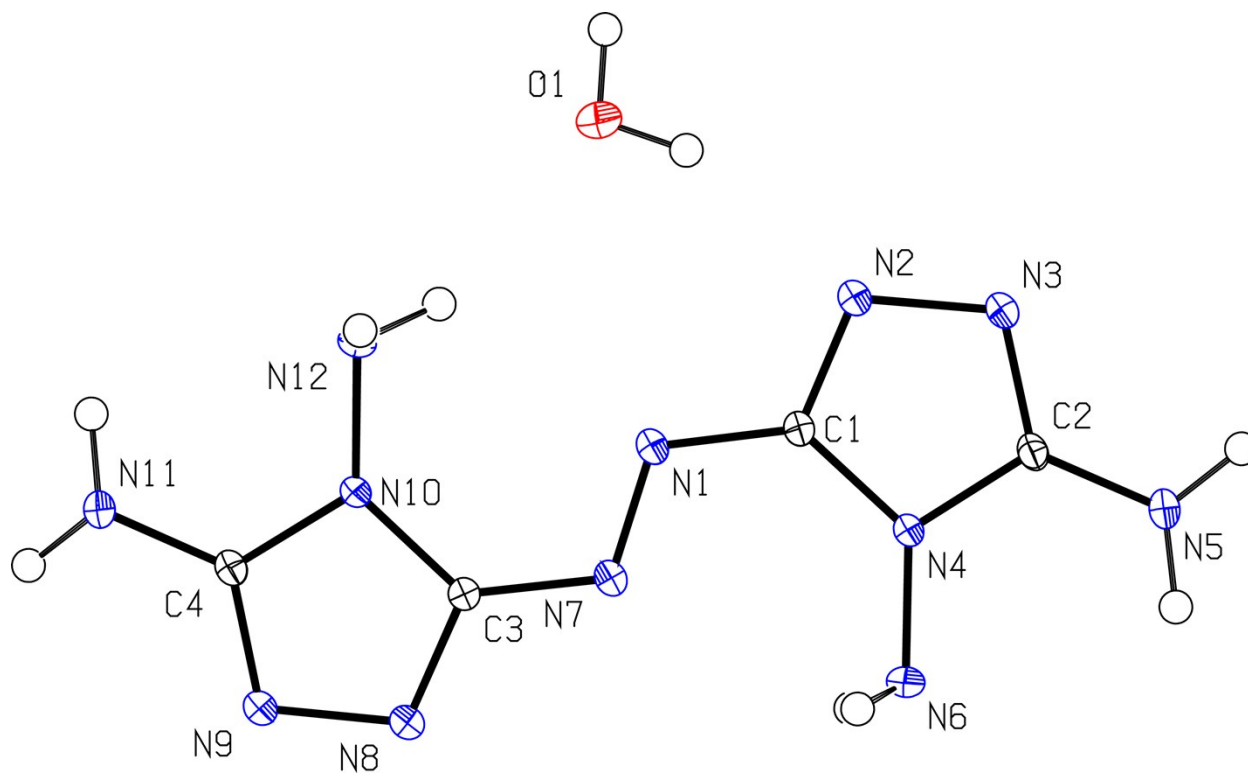

View of the structure of  $2a \cdot H_2O$ , showing the atom-labelling scheme. Displacement ellipsoids are drawn at the 50% probability level.

**Crystal data**

|                              |                                                         |
|------------------------------|---------------------------------------------------------|
| $C_4H_8N_{12} \cdot H_2O$    | $Z = 2$                                                 |
| $M_r = 242.24$               | $F(000) = 252$                                          |
| Triclinic, $P\bar{1}$        | $D_x = 1.626 \text{ Mg m}^{-3}$                         |
| $a = 7.9678 (5) \text{ \AA}$ | Mo $K\alpha$ radiation, $\lambda = 0.71073 \text{ \AA}$ |
| $b = 8.1421 (5) \text{ \AA}$ | Cell parameters from 8021 reflections                   |
| $c = 8.4183 (6) \text{ \AA}$ | $\theta = 2.6\text{--}33.2^\circ$                       |
| $\alpha = 89.448 (2)^\circ$  | $\mu = 0.13 \text{ mm}^{-1}$                            |
| $\beta = 69.466 (2)^\circ$   | $T = 150 \text{ K}$                                     |



|                                |                                           |
|--------------------------------|-------------------------------------------|
| $\gamma = 76.132 (2)^\circ$    | Plate, orange                             |
| $V = 494.86 (6) \text{ \AA}^3$ | $0.45 \times 0.25 \times 0.18 \text{ mm}$ |

### Data collection

|                                                                              |                                                                        |
|------------------------------------------------------------------------------|------------------------------------------------------------------------|
| Bruker AXS D8 Quest CMOS diffractometer                                      | 12648 measured reflections                                             |
| Radiation source: fine focus sealed tube X-ray source                        | 3727 independent reflections                                           |
| Triumph curved graphite crystal monochromator                                | 3189 reflections with $I > 2\sigma(I)$                                 |
| Detector resolution: $10.4167 \text{ pixels mm}^{-1}$                        | $R_{\text{int}} = 0.026$                                               |
| $\omega$ and phi scans                                                       | $\theta_{\text{max}} = 33.2^\circ$ , $\theta_{\text{min}} = 2.6^\circ$ |
| Absorption correction: multi-scan, <i>SADABS 2016/2, Krause et al., 2015</i> | $h = -11 \rightarrow 12$                                               |
| $T_{\text{min}} = 0.691$ , $T_{\text{max}} = 0.747$                          | $k = -10 \rightarrow 12$                                               |
|                                                                              | $l = -12 \rightarrow 12$                                               |

### Refinement

|                                 |                                                                                  |
|---------------------------------|----------------------------------------------------------------------------------|
| Refinement on $F^2$             | Primary atom site location: structure-invariant direct methods                   |
| Least-squares matrix: full      | Secondary atom site location: difference Fourier map                             |
| $R[F^2 > 2\sigma(F^2)] = 0.033$ | Hydrogen site location: difference Fourier map                                   |
| $wR(F^2) = 0.093$               | All H-atom parameters refined                                                    |
| $S = 1.07$                      | $w = 1/[\sigma^2(F_o^2) + (0.0499P)^2 + 0.0929P]$ where $P = (F_o^2 + 2F_c^2)/3$ |
| 3727 reflections                | $(\Delta/\sigma)_{\text{max}} < 0.001$                                           |
| 194 parameters                  | $\Delta\rho_{\text{max}} = 0.48 \text{ e \AA}^{-3}$                              |
| 0 restraints                    | $\Delta\rho_{\text{min}} = -0.28 \text{ e \AA}^{-3}$                             |

### Geometric parameters ( $\text{\AA}$ , $^\circ$ ) for $2a \cdot \text{H}_2\text{O}$

|        |            |          |            |
|--------|------------|----------|------------|
| O1–H1A | 0.840 (16) | N6–H6B   | 0.903 (13) |
| O1–H2B | 0.858 (16) | N7–C3    | 1.3712 (9) |
| N1–N7  | 1.2797 (8) | N8–C3    | 1.3186 (9) |
| N1–C1  | 1.3734 (9) | N8–N9    | 1.3692 (9) |
| N2–C1  | 1.3176 (9) | N9–C4    | 1.3387 (9) |
| N2–N3  | 1.3771 (9) | N10–C4   | 1.3624 (9) |
| N3–C2  | 1.3430 (9) | N10–C3   | 1.3844 (9) |
| N4–C2  | 1.3649 (9) | N10–N12  | 1.4118 (8) |
| N4–C1  | 1.3870 (9) | N11–C4   | 1.3417 (9) |
| N4–N6  | 1.4076 (8) | N11–H11A | 0.896 (14) |
| N5–C2  | 1.3341 (9) | N11–H11B | 0.873 (15) |

|             |             |               |             |
|-------------|-------------|---------------|-------------|
| N5-H5A      | 0.919 (13)  | N12-H12A      | 0.900 (14)  |
| N5-H5B      | 0.911 (15)  | N12-H12B      | 0.901 (13)  |
| N6-H6A      | 0.892 (14)  |               |             |
|             |             |               |             |
| H1A-O1-H2B  | 104.8 (14)  | C4-N11-H11A   | 117.9 (8)   |
| N7-N1-C1    | 114.56 (6)  | C4-N11-H11B   | 115.4 (9)   |
| C1-N2-N3    | 108.19 (6)  | H11A-N11-H11B | 119.3 (12)  |
| C2-N3-N2    | 107.09 (6)  | N10-N12-H12A  | 109.3 (8)   |
| C2-N4-C1    | 105.00 (6)  | N10-N12-H12B  | 106.9 (8)   |
| C2-N4-N6    | 123.30 (6)  | H12A-N12-H12B | 106.5 (11)  |
| C1-N4-N6    | 131.69 (6)  | N2-C1-N1      | 119.98 (6)  |
| C2-N5-H5A   | 119.6 (8)   | N2-C1-N4      | 109.79 (6)  |
| C2-N5-H5B   | 118.2 (9)   | N1-C1-N4      | 130.21 (6)  |
| H5A-N5-H5B  | 120.7 (12)  | N5-C2-N3      | 125.75 (7)  |
| N4-N6-H6A   | 106.0 (9)   | N5-C2-N4      | 124.30 (6)  |
| N4-N6-H6B   | 107.2 (8)   | N3-C2-N4      | 109.92 (6)  |
| H6A-N6-H6B  | 106.1 (12)  | N8-C3-N7      | 120.16 (6)  |
| N1-N7-C3    | 113.78 (6)  | N8-C3-N10     | 109.40 (6)  |
| C3-N8-N9    | 108.54 (6)  | N7-C3-N10     | 130.39 (6)  |
| C4-N9-N8    | 106.96 (6)  | N9-C4-N11     | 125.89 (6)  |
| C4-N10-C3   | 105.00 (6)  | N9-C4-N10     | 110.09 (6)  |
| C4-N10-N12  | 122.38 (6)  | N11-C4-N10    | 123.91 (6)  |
| C3-N10-N12  | 132.51 (6)  |               |             |
|             |             |               |             |
| C1-N2-N3-C2 | 0.65 (8)    | N6-N4-C2-N3   | -178.49 (6) |
| C1-N1-N7-C3 | -178.23 (6) | N9-N8-C3-N7   | -178.31 (6) |
| C3-N8-N9-C4 | 0.08 (8)    | N9-N8-C3-N10  | -0.62 (8)   |
| N3-N2-C1-N1 | -179.09 (6) | N1-N7-C3-N8   | 171.44 (7)  |
| N3-N2-C1-N4 | -0.34 (8)   | N1-N7-C3-N10  | -5.70 (11)  |
| N7-N1-C1-N2 | -179.46 (7) | C4-N10-C3-N8  | 0.90 (8)    |
| N7-N1-C1-N4 | 2.07 (11)   | N12-N10-C3-N8 | 177.08 (7)  |
| C2-N4-C1-N2 | -0.10 (8)   | C4-N10-C3-N7  | 178.27 (7)  |
| N6-N4-C1-N2 | 178.79 (7)  | N12-N10-C3-N7 | -5.54 (13)  |
| C2-N4-C1-N1 | 178.49 (7)  | N8-N9-C4-N11  | -175.87 (7) |
| N6-N4-C1-N1 | -2.62 (13)  | N8-N9-C4-N10  | 0.50 (8)    |
| N2-N3-C2-N5 | 177.54 (7)  | C3-N10-C4-N9  | -0.85 (8)   |

|             |             |                |             |
|-------------|-------------|----------------|-------------|
| N2–N3–C2–N4 | -0.73 (8)   | N12–N10–C4–N9  | -177.52 (6) |
| C1–N4–C2–N5 | -177.78 (7) | C3–N10–C4–N11  | 175.60 (7)  |
| N6–N4–C2–N5 | 3.20 (11)   | N12–N10–C4–N11 | -1.06 (11)  |
| C1–N4–C2–N3 | 0.52 (8)    |                |             |

**Hydrogen-bond geometry (Å, °) for 2a•H<sub>2</sub>O**

| <i>D</i> –H··· <i>A</i>                | <i>D</i> –H | H··· <i>A</i> | <i>D</i> ··· <i>A</i> | <i>D</i> –H··· <i>A</i> |
|----------------------------------------|-------------|---------------|-----------------------|-------------------------|
| O1–H1 <i>A</i> ···N8 <sup>i</sup>      | 0.840 (16)  | 1.945 (16)    | 2.7563 (9)            | 162.2 (14)              |
| O1–H2 <i>B</i> ···N2                   | 0.858 (16)  | 2.120 (16)    | 2.9284 (9)            | 156.7 (15)              |
| N5–H5 <i>A</i> ···N12 <sup>ii</sup>    | 0.919 (13)  | 2.348 (13)    | 3.1678 (9)            | 148.5 (11)              |
| N5–H5 <i>B</i> ···N9 <sup>iii</sup>    | 0.911 (15)  | 2.055 (15)    | 2.9456 (9)            | 165.4 (13)              |
| N6–H6 <i>A</i> ···N3 <sup>iv</sup>     | 0.892 (14)  | 2.646 (13)    | 3.2690 (10)           | 127.7 (11)              |
| N6–H6 <i>B</i> ···O1 <sup>v</sup>      | 0.903 (13)  | 2.146 (13)    | 3.0139 (10)           | 160.9 (12)              |
| N11–H11 <i>A</i> ···N6 <sup>vi</sup>   | 0.896 (14)  | 2.280 (14)    | 3.0709 (9)            | 147.2 (11)              |
| N11–H11 <i>B</i> ···N3 <sup>vii</sup>  | 0.873 (15)  | 2.126 (15)    | 2.9694 (9)            | 162.3 (13)              |
| N12–H12 <i>A</i> ···O1                 | 0.900 (14)  | 2.289 (14)    | 3.1208 (9)            | 153.6 (11)              |
| N12–H12 <i>A</i> ···N1                 | 0.900 (14)  | 2.383 (13)    | 2.9213 (9)            | 118.5 (10)              |
| N12–H12 <i>B</i> ···O1 <sup>viii</sup> | 0.901 (13)  | 2.151 (13)    | 3.0324 (10)           | 165.8 (12)              |

Symmetry codes: (i)  $x, y, z+1$ ; (ii)  $x-1, y+1, z$ ; (iii)  $x-1, y+1, z+1$ ; (iv)  $-x, -y+1, -z+1$ ; (v)  $-x, -y, -z+1$ ; (vi)  $x+1, y-1, z$ ; (vii)  $x+1, y-1, z-1$ ; (viii)  $-x+1, -y, -z+1$ .

**Single Crystal XRD data for 4,4',5,5' tetra-amino-3,3'-azo bis-1,2,4-triazole monohydrate (TAABT·H<sub>2</sub>O) (2b·H<sub>2</sub>O)**

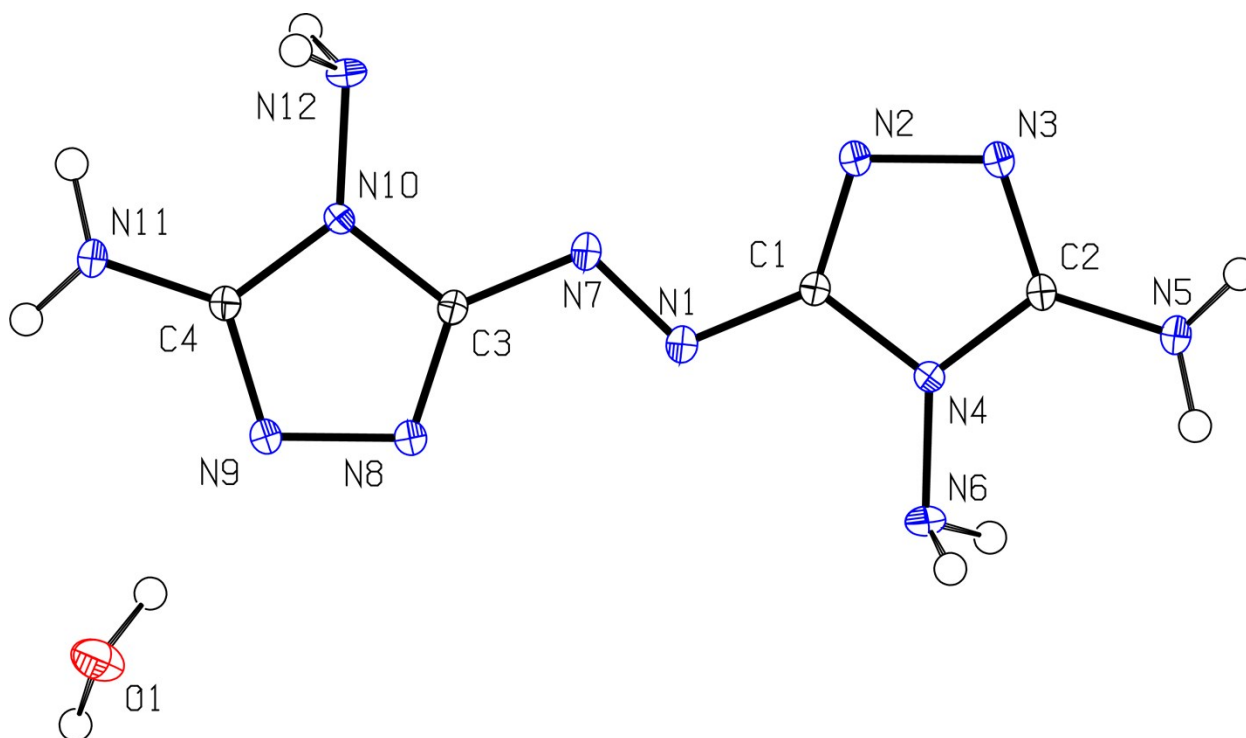

View of the structure of **2b·H<sub>2</sub>O**, showing the atom-labelling scheme. Displacement ellipsoids are drawn at the 50% probability level.

**Crystal data**

|                                                                 |                                                         |
|-----------------------------------------------------------------|---------------------------------------------------------|
| C <sub>4</sub> H <sub>8</sub> N <sub>12</sub> ·H <sub>2</sub> O | $F(000) = 504$                                          |
| $M_r = 242.24$                                                  | $D_x = 1.723 \text{ Mg m}^{-3}$                         |
| Monoclinic, $P2_1/c$                                            | Mo $K\alpha$ radiation, $\lambda = 0.71073 \text{ \AA}$ |
| $a = 11.0909 (7) \text{ \AA}$                                   | Cell parameters from 6377 reflections                   |
| $b = 12.0277 (7) \text{ \AA}$                                   | $\theta = 2.5\text{--}33.1^\circ$                       |
| $c = 7.0869 (5) \text{ \AA}$                                    | $\mu = 0.14 \text{ mm}^{-1}$                            |
| $\beta = 99.011 (3)^\circ$                                      | $T = 150 \text{ K}$                                     |
| $V = 933.71 (10) \text{ \AA}^3$                                 | Rod, red                                                |
| $Z = 4$                                                         | $0.35 \times 0.11 \times 0.10 \text{ mm}$               |

**Data collection**

|                                                       |                              |
|-------------------------------------------------------|------------------------------|
| Bruker AXS D8 Quest CMOS diffractometer               | 24491 measured reflections   |
| Radiation source: fine focus sealed tube X-ray source | 3582 independent reflections |

|                                                                              |                                                                        |
|------------------------------------------------------------------------------|------------------------------------------------------------------------|
| Triumph curved graphite crystal monochromator                                | 2373 reflections with $I > 2\sigma(I)$                                 |
| Detector resolution: 10.4167 pixels mm <sup>-1</sup>                         | $R_{\text{int}} = 0.063$                                               |
| $\omega$ and $\phi$ scans                                                    | $\theta_{\text{max}} = 33.2^\circ$ , $\theta_{\text{min}} = 2.5^\circ$ |
| Absorption correction: multi-scan, <i>SADABS 2016/2, Krause et al., 2015</i> | $h = -17 \rightarrow 17$                                               |
| $T_{\text{min}} = 0.694$ , $T_{\text{max}} = 0.747$                          | $k = -18 \rightarrow 18$                                               |
|                                                                              | $l = -10 \rightarrow 10$                                               |

### Refinement

|                                 |                                                                                  |
|---------------------------------|----------------------------------------------------------------------------------|
| Refinement on $F^2$             | Primary atom site location: structure-invariant direct methods                   |
| Least-squares matrix: full      | Secondary atom site location: difference Fourier map                             |
| $R[F^2 > 2\sigma(F^2)] = 0.049$ | Hydrogen site location: difference Fourier map                                   |
| $wR(F^2) = 0.133$               | All H-atom parameters refined                                                    |
| $S = 1.04$                      | $w = 1/[\sigma^2(F_o^2) + (0.0648P)^2 + 0.2487P]$ where $P = (F_o^2 + 2F_c^2)/3$ |
| 3582 reflections                | $(\Delta/\sigma)_{\text{max}} < 0.001$                                           |
| 194 parameters                  | $\Delta\rho_{\text{max}} = 0.47 \text{ e } \text{\AA}^{-3}$                      |
| 0 restraints                    | $\Delta\rho_{\text{min}} = -0.45 \text{ e } \text{\AA}^{-3}$                     |

### Geometric parameters ( $\text{\AA}$ , $^\circ$ ) for $2b \cdot \text{H}_2\text{O}$

|            |             |             |             |
|------------|-------------|-------------|-------------|
| O1–H1A     | 0.90 (3)    | N6–H6B      | 0.92 (2)    |
| O1–H1B     | 0.90 (3)    | N7–C3       | 1.3827 (16) |
| N1–N7      | 1.2742 (15) | N8–C3       | 1.3140 (17) |
| N1–C1      | 1.3825 (17) | N8–N9       | 1.3829 (15) |
| N2–C1      | 1.3182 (17) | N9–C4       | 1.3370 (16) |
| N2–N3      | 1.3754 (15) | N10–C4      | 1.3584 (17) |
| N3–C2      | 1.3370 (16) | N10–C3      | 1.3803 (16) |
| N4–C2      | 1.3550 (17) | N10–N12     | 1.3976 (15) |
| N4–C1      | 1.3780 (16) | N11–C4      | 1.3492 (17) |
| N4–N6      | 1.4032 (15) | N11–H11A    | 0.927 (19)  |
| N5–C2      | 1.3469 (17) | N11–H11B    | 0.88 (2)    |
| N5–H5A     | 0.89 (2)    | N12–H12A    | 0.913 (19)  |
| N5–H5B     | 0.90 (2)    | N12–H12B    | 0.923 (18)  |
| N6–H6A     | 0.91 (2)    |             |             |
|            |             |             |             |
| H1A–O1–H1B | 108 (2)     | C4–N11–H11A | 119.4 (12)  |
| N7–N1–C1   | 112.95 (11) | C4–N11–H11B | 116.1 (13)  |

|             |              |                |              |
|-------------|--------------|----------------|--------------|
| C1–N2–N3    | 107.13 (10)  | H11A–N11–H11B  | 117.4 (17)   |
| C2–N3–N2    | 107.73 (11)  | N10–N12–H12A   | 107.0 (12)   |
| C2–N4–C1    | 105.19 (10)  | N10–N12–H12B   | 110.0 (11)   |
| C2–N4–N6    | 129.28 (11)  | H12A–N12–H12B  | 108.4 (16)   |
| C1–N4–N6    | 125.40 (11)  | N2–C1–N4       | 110.27 (11)  |
| C2–N5–H5A   | 119.4 (14)   | N2–C1–N1       | 130.04 (11)  |
| C2–N5–H5B   | 116.8 (13)   | N4–C1–N1       | 119.63 (11)  |
| H5A–N5–H5B  | 116.5 (19)   | N3–C2–N5       | 125.38 (12)  |
| N4–N6–H6A   | 109.0 (12)   | N3–C2–N4       | 109.68 (11)  |
| N4–N6–H6B   | 106.9 (13)   | N5–C2–N4       | 124.89 (12)  |
| H6A–N6–H6B  | 109.0 (17)   | N8–C3–N10      | 110.30 (11)  |
| N1–N7–C3    | 113.01 (11)  | N8–C3–N7       | 130.78 (12)  |
| C3–N8–N9    | 107.27 (10)  | N10–C3–N7      | 118.90 (11)  |
| C4–N9–N8    | 107.52 (10)  | N9–C4–N11      | 126.12 (12)  |
| C4–N10–C3   | 105.20 (10)  | N9–C4–N10      | 109.67 (11)  |
| C4–N10–N12  | 129.35 (11)  | N11–C4–N10     | 124.11 (12)  |
| C3–N10–N12  | 125.44 (11)  |                |              |
|             |              |                |              |
| C1–N2–N3–C2 | -0.29 (15)   | N6–N4–C2–N5    | -1.8 (2)     |
| C1–N1–N7–C3 | -177.18 (11) | N9–N8–C3–N10   | 0.05 (15)    |
| C3–N8–N9–C4 | -1.01 (14)   | N9–N8–C3–N7    | 178.87 (14)  |
| N3–N2–C1–N4 | 0.23 (15)    | C4–N10–C3–N8   | 0.90 (15)    |
| N3–N2–C1–N1 | 177.39 (13)  | N12–N10–C3–N8  | 179.96 (11)  |
| C2–N4–C1–N2 | -0.08 (15)   | C4–N10–C3–N7   | -178.08 (12) |
| N6–N4–C1–N2 | -176.21 (12) | N12–N10–C3–N7  | 0.98 (19)    |
| C2–N4–C1–N1 | -177.58 (12) | N1–N7–C3–N8    | -1.4 (2)     |
| N6–N4–C1–N1 | 6.29 (19)    | N1–N7–C3–N10   | 177.33 (11)  |
| N7–N1–C1–N2 | 2.9 (2)      | N8–N9–C4–N11   | -174.95 (12) |
| N7–N1–C1–N4 | 179.80 (11)  | N8–N9–C4–N10   | 1.60 (14)    |
| N2–N3–C2–N5 | 177.84 (13)  | C3–N10–C4–N9   | -1.53 (14)   |
| N2–N3–C2–N4 | 0.25 (15)    | N12–N10–C4–N9  | 179.45 (12)  |
| C1–N4–C2–N3 | -0.11 (14)   | C3–N10–C4–N11  | 175.09 (12)  |
| N6–N4–C2–N3 | 175.82 (12)  | N12–N10–C4–N11 | -3.9 (2)     |
| C1–N4–C2–N5 | -177.72 (13) |                |              |

**Hydrogen-bond geometry (Å, °) for 2b•H<sub>2</sub>O**

| <i>D-H...A</i>                | <i>D-H</i> | <i>H...A</i> | <i>D...A</i> | <i>D-H...A</i> |
|-------------------------------|------------|--------------|--------------|----------------|
| O1-H1A...N3 <sup>i</sup>      | 0.90 (3)   | 1.95 (3)     | 2.7779 (16)  | 153 (2)        |
| O1-H1B...N9                   | 0.90 (3)   | 1.94 (3)     | 2.8413 (16)  | 171 (2)        |
| N5-H5A...N8 <sup>ii</sup>     | 0.89 (2)   | 2.13 (2)     | 2.9852 (17)  | 160 (2)        |
| N5-H5B...N1 <sup>ii</sup>     | 0.90 (2)   | 2.60 (2)     | 3.0252 (16)  | 110.1 (15)     |
| N5-H5B...N6 <sup>ii</sup>     | 0.90 (2)   | 2.21 (2)     | 3.1010 (17)  | 168.6 (18)     |
| N6-H6A...O1 <sup>iii</sup>    | 0.91 (2)   | 1.96 (2)     | 2.8554 (17)  | 167.6 (18)     |
| N6-H6B...N5 <sup>iv</sup>     | 0.92 (2)   | 2.38 (2)     | 3.2448 (18)  | 157.7 (17)     |
| N11-H11A...N2 <sup>v</sup>    | 0.927 (19) | 2.099 (19)   | 2.9769 (16)  | 157.6 (16)     |
| N11-H11B...N7 <sup>v</sup>    | 0.88 (2)   | 2.62 (2)     | 3.0584 (16)  | 111.9 (15)     |
| N11-H11B...N12 <sup>v</sup>   | 0.88 (2)   | 2.20 (2)     | 3.0749 (18)  | 172.8 (18)     |
| N12-H12A...N11 <sup>vi</sup>  | 0.913 (19) | 2.32 (2)     | 3.1913 (18)  | 160.6 (16)     |
| N12-H12B...O1 <sup>vii</sup>  | 0.923 (18) | 2.292 (18)   | 2.9278 (16)  | 125.6 (15)     |
| N12-H12B...N9 <sup>viii</sup> | 0.923 (18) | 2.530 (18)   | 3.2619 (17)  | 136.5 (14)     |

Symmetry codes: (i)  $x, y+1, z$ ; (ii)  $-x, y-1/2, -z-1/2$ ; (iii)  $-x, -y+1, -z$ ; (iv)  $-x, -y, -z-1$ ; (v)  $-x+1, y+1/2, -z+1/2$ ; (vi)  $-x+1, -y+1, -z+1$ ; (vii)  $-x+1, y-1/2, -z+1/2$ ; (viii)  $-x+1, -y+1, -z$ .

**Single Crystal XRD data for 4,4',5,5' tetra-amino-3,3'-azo bis-1,2,4-triazolium dinitrate [HTAABTH (NO<sub>3</sub>)<sub>2</sub>] (3)**

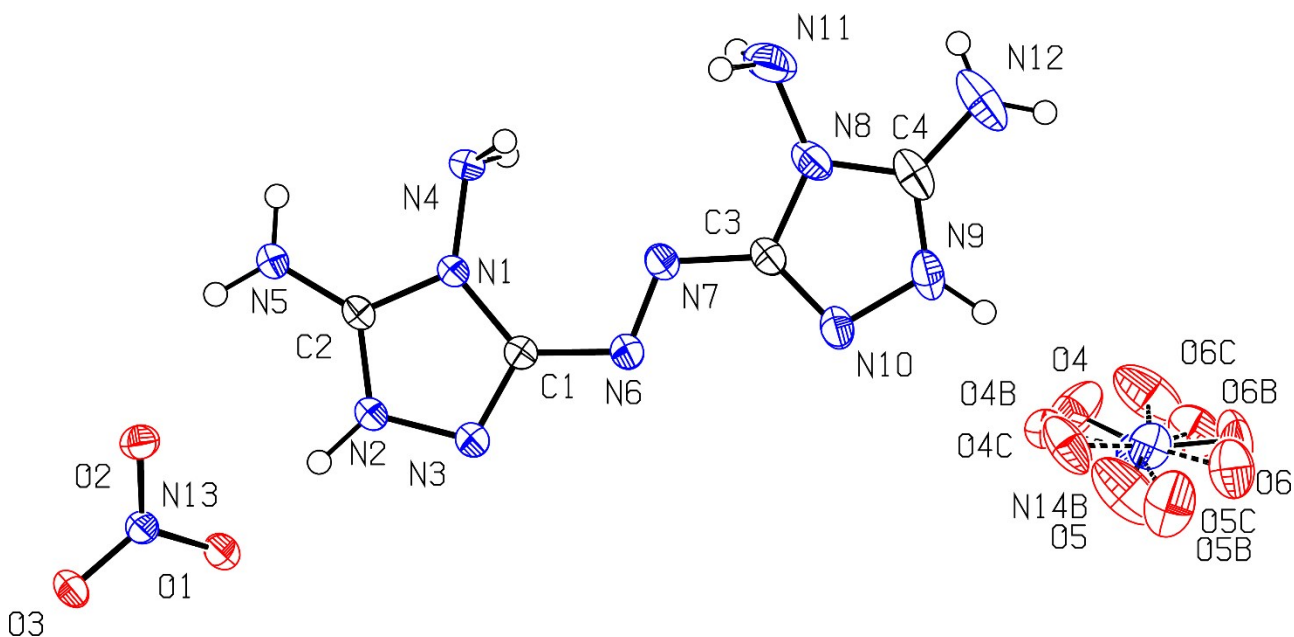

View of the structure of **3**, showing the atom-labelling scheme. Displacement ellipsoids are drawn at the 50% probability level.

One of the two nitrate anions is disordered by rotation in place. It was modeled as disordered over three orientations. The three moieties were restrained to have similar geometries as the other not disordered nitrate anion.  $U^{ij}$  components of ADPs for disordered atoms closer to each other than 2.0 Å were restrained to be similar. Subject to these conditions the occupancy rates refined to 0.504(3), 0.351(3) and 0.145(2).

|                                 |                                                         |
|---------------------------------|---------------------------------------------------------|
| $C_4H_{10}N_{12} \cdot 2(NO_3)$ | $Z = 2$                                                 |
| $M_r = 350.26$                  | $F(000) = 360$                                          |
| Triclinic, $P\bar{1}$           | $D_x = 1.776 \text{ Mg m}^{-3}$                         |
| $a = 6.6892 (2) \text{ \AA}$    | Mo $K\alpha$ radiation, $\lambda = 0.71073 \text{ \AA}$ |
| $b = 8.6817 (3) \text{ \AA}$    | Cell parameters from 9492 reflections                   |
| $c = 12.0249 (5) \text{ \AA}$   | $\theta = 2.4\text{--}33.0^\circ$                       |
| $\alpha = 80.3377 (17)^\circ$   | $\mu = 0.16 \text{ mm}^{-1}$                            |
| $\beta = 75.0338 (15)^\circ$    | $T = 150 \text{ K}$                                     |



|                                |                                           |
|--------------------------------|-------------------------------------------|
| $\gamma = 77.9914 (14)^\circ$  | Block, orange                             |
| $V = 655.05 (4) \text{ \AA}^3$ | $0.22 \times 0.20 \times 0.15 \text{ mm}$ |

### Data collection

|                                                                              |                                                                        |
|------------------------------------------------------------------------------|------------------------------------------------------------------------|
| Bruker AXS D8 Quest CMOS diffractometer                                      | 29403 measured reflections                                             |
| Radiation source: fine focus sealed tube X-ray source                        | 4987 independent reflections                                           |
| Triumph curved graphite crystal monochromator                                | 3554 reflections with $I > 2\sigma(I)$                                 |
| Detector resolution: $7.4074 \text{ pixels mm}^{-1}$                         | $R_{\text{int}} = 0.046$                                               |
| $\omega$ and phi scans                                                       | $\theta_{\text{max}} = 33.2^\circ$ , $\theta_{\text{min}} = 2.8^\circ$ |
| Absorption correction: multi-scan, <i>SADABS 2016/2, Krause et al., 2015</i> | $h = -10 \rightarrow 9$                                                |
| $T_{\text{min}} = 0.718$ , $T_{\text{max}} = 0.747$                          | $k = -13 \rightarrow 13$                                               |
|                                                                              | $l = -18 \rightarrow 18$                                               |

### Refinement

|                                 |                                                                                  |
|---------------------------------|----------------------------------------------------------------------------------|
| Refinement on $F^2$             | Primary atom site location: structure-invariant direct methods                   |
| Least-squares matrix: full      | Secondary atom site location: difference Fourier map                             |
| $R[F^2 > 2\sigma(F^2)] = 0.042$ | Hydrogen site location: difference Fourier map                                   |
| $wR(F^2) = 0.112$               | All H-atom parameters refined                                                    |
| $S = 1.04$                      | $w = 1/[\sigma^2(F_o^2) + (0.0496P)^2 + 0.1558P]$ where $P = (F_o^2 + 2F_c^2)/3$ |
| 4987 reflections                | $(\Delta/\sigma)_{\text{max}} < 0.001$                                           |
| 332 parameters                  | $\Delta\rho_{\text{max}} = 0.29 \text{ e \AA}^{-3}$                              |
| 325 restraints                  | $\Delta\rho_{\text{min}} = -0.26 \text{ e \AA}^{-3}$                             |
| Extinction coefficient: n/a     | Extinction correction: none                                                      |

### Geometric parameters ( $\text{\AA}$ , $^\circ$ ) for 3

|        |             |          |             |
|--------|-------------|----------|-------------|
| N1–C2  | 1.3517 (13) | N9–H9    | 0.89 (2)    |
| N1–C1  | 1.3913 (13) | N10–C3   | 1.2996 (16) |
| N1–N4  | 1.4086 (13) | N11–H11A | 0.93 (3)    |
| N2–C2  | 1.3406 (14) | N11–H11B | 0.94 (2)    |
| N2–N3  | 1.3690 (13) | N12–C4   | 1.3188 (18) |
| N2–H2  | 0.929 (19)  | N12–H12A | 0.84 (3)    |
| N3–C1  | 1.3054 (14) | N12–H12B | 0.81 (2)    |
| N4–H4A | 0.928 (18)  | N13–O3   | 1.2290 (12) |
| N4–H4B | 0.929 (19)  | N13–O2   | 1.2512 (12) |
| N5–C2  | 1.3158 (14) | N13–O1   | 1.2773 (12) |

|               |             |               |             |
|---------------|-------------|---------------|-------------|
| N5-H5A        | 0.868 (17)  | N14-O5        | 1.221 (7)   |
| N5-H5B        | 0.855 (18)  | N14-O6        | 1.240 (7)   |
| N6-N7         | 1.2609 (13) | N14-O4        | 1.258 (7)   |
| N6-C1         | 1.3897 (14) | N14B-O6B      | 1.197 (10)  |
| N7-C3         | 1.3913 (14) | N14B-O5B      | 1.245 (11)  |
| N8-C4         | 1.3435 (17) | N14B-O4B      | 1.248 (10)  |
| N8-C3         | 1.3797 (15) | N14C-O6C      | 1.223 (14)  |
| N8-N11        | 1.3996 (17) | N14C-O5C      | 1.255 (14)  |
| N9-C4         | 1.3260 (19) | N14C-O4C      | 1.262 (14)  |
| N9-N10        | 1.3771 (14) |               |             |
|               |             |               |             |
| C2-N1-C1      | 106.19 (9)  | C4-N12-H12B   | 114.8 (18)  |
| C2-N1-N4      | 120.56 (9)  | H12A-N12-H12B | 123 (3)     |
| C1-N1-N4      | 133.07 (9)  | O3-N13-O2     | 122.32 (10) |
| C2-N2-N3      | 111.70 (9)  | O3-N13-O1     | 119.31 (9)  |
| C2-N2-H2      | 124.5 (12)  | O2-N13-O1     | 118.37 (9)  |
| N3-N2-H2      | 123.0 (12)  | O5-N14-O6     | 121.7 (7)   |
| C1-N3-N2      | 104.58 (9)  | O5-N14-O4     | 118.8 (7)   |
| N1-N4-H4A     | 107.4 (11)  | O6-N14-O4     | 119.5 (6)   |
| N1-N4-H4B     | 107.8 (11)  | O6B-N14B-O5B  | 118.4 (10)  |
| H4A-N4-H4B    | 107.6 (15)  | O6B-N14B-O4B  | 121.6 (10)  |
| C2-N5-H5A     | 119.3 (11)  | O5B-N14B-O4B  | 119.4 (9)   |
| C2-N5-H5B     | 117.7 (11)  | O6C-N14C-O5C  | 122.4 (18)  |
| H5A-N5-H5B    | 122.6 (15)  | O6C-N14C-O4C  | 114.3 (16)  |
| N7-N6-C1      | 111.84 (9)  | O5C-N14C-O4C  | 119.2 (16)  |
| N6-N7-C3      | 114.13 (9)  | N3-C1-N6      | 119.56 (9)  |
| C4-N8-C3      | 106.69 (11) | N3-C1-N1      | 111.23 (9)  |
| C4-N8-N11     | 120.93 (11) | N6-C1-N1      | 129.19 (9)  |
| C3-N8-N11     | 132.29 (11) | N5-C2-N2      | 128.23 (10) |
| C4-N9-N10     | 112.17 (11) | N5-C2-N1      | 125.49 (10) |
| C4-N9-H9      | 131.8 (14)  | N2-C2-N1      | 106.27 (9)  |
| N10-N9-H9     | 115.9 (14)  | N10-C3-N8     | 111.51 (10) |
| C3-N10-N9     | 103.66 (10) | N10-C3-N7     | 131.08 (10) |
| N8-N11-H11A   | 104.0 (17)  | N8-C3-N7      | 117.41 (10) |
| N8-N11-H11B   | 105.9 (13)  | N12-C4-N9     | 129.46 (16) |
| H11A-N11-H11B | 108 (2)     | N12-C4-N8     | 124.58 (16) |

|              |              |               |              |
|--------------|--------------|---------------|--------------|
| C4–N12–H12A  | 121.3 (19)   | N9–C4–N8      | 105.96 (10)  |
| C2–N2–N3–C1  | 1.30 (12)    | N4–N1–C2–N2   | 177.61 (9)   |
| C1–N6–N7–C3  | -177.47 (9)  | N9–N10–C3–N8  | 0.32 (13)    |
| C4–N9–N10–C3 | 0.35 (14)    | N9–N10–C3–N7  | 179.26 (12)  |
| N2–N3–C1–N6  | -178.73 (9)  | C4–N8–C3–N10  | -0.86 (14)   |
| N2–N3–C1–N1  | -0.05 (12)   | N11–N8–C3–N10 | -177.47 (15) |
| N7–N6–C1–N3  | -175.39 (10) | C4–N8–C3–N7   | -179.96 (10) |
| N7–N6–C1–N1  | 6.19 (16)    | N11–N8–C3–N7  | 3.4 (2)      |
| C2–N1–C1–N3  | -1.17 (12)   | N6–N7–C3–N10  | 3.16 (18)    |
| N4–N1–C1–N3  | -176.13 (11) | N6–N7–C3–N8   | -177.95 (10) |
| C2–N1–C1–N6  | 177.36 (11)  | N10–N9–C4–N12 | 179.15 (14)  |
| N4–N1–C1–N6  | 2.4 (2)      | N10–N9–C4–N8  | -0.87 (15)   |
| N3–N2–C2–N5  | 179.12 (11)  | C3–N8–C4–N12  | -179.01 (13) |
| N3–N2–C2–N1  | -2.03 (12)   | N11–N8–C4–N12 | -1.9 (2)     |
| C1–N1–C2–N5  | -179.23 (10) | C3–N8–C4–N9   | 1.01 (14)    |
| N4–N1–C2–N5  | -3.50 (16)   | N11–N8–C4–N9  | 178.09 (14)  |
| C1–N1–C2–N2  | 1.88 (11)    |               |              |

### Hydrogen-bond geometry (Å, °) for 3

| $D-H\cdots A$                     | $D-H$ (Å)  | $H\cdots A$ (Å) | $D\cdots A$ (Å) | $D-H\cdots A$ (°) |
|-----------------------------------|------------|-----------------|-----------------|-------------------|
| N2–H2 $\cdots$ N13                | 0.929 (19) | 2.490 (19)      | 3.3500 (13)     | 154.1 (15)        |
| N2–H2 $\cdots$ O1                 | 0.929 (19) | 1.770 (19)      | 2.6959 (12)     | 173.9 (17)        |
| N2–H2 $\cdots$ O2                 | 0.929 (19) | 2.516 (19)      | 3.1441 (13)     | 125.1 (14)        |
| N4–H4A $\cdots$ O5 <sup>i</sup>   | 0.928 (18) | 2.651 (18)      | 3.251 (5)       | 123.0 (13)        |
| N4–H4A $\cdots$ O6 <sup>ii</sup>  | 0.928 (18) | 2.217 (18)      | 3.046 (4)       | 148.3 (14)        |
| N4–H4A $\cdots$ O6B <sup>ii</sup> | 0.928 (18) | 2.142 (19)      | 2.987 (4)       | 150.9 (15)        |
| N4–H4A $\cdots$ O4C <sup>i</sup>  | 0.928 (18) | 2.351 (19)      | 2.958 (8)       | 122.8 (14)        |
| N4–H4A $\cdots$ O6C <sup>ii</sup> | 0.928 (18) | 2.31 (2)        | 3.172 (13)      | 155.1 (15)        |
| N4–H4B $\cdots$ O2 <sup>iii</sup> | 0.929 (19) | 2.192 (19)      | 3.1168 (13)     | 173.1 (16)        |
| N5–H5A $\cdots$ O2                | 0.868 (17) | 2.431 (17)      | 3.1088 (13)     | 135.3 (13)        |
| N5–H5A $\cdots$ O3 <sup>iv</sup>  | 0.868 (17) | 2.330 (16)      | 3.0824 (13)     | 145.2 (14)        |
| N5–H5B $\cdots$ N13 <sup>v</sup>  | 0.855 (18) | 2.712 (17)      | 3.4365 (14)     | 143.5 (14)        |
| N5–H5B $\cdots$ O1 <sup>v</sup>   | 0.855 (18) | 2.039 (18)      | 2.8851 (13)     | 170.1 (16)        |
| N9–H9 $\cdots$ O4                 | 0.89 (2)   | 1.93 (2)        | 2.771 (3)       | 157.4 (19)        |

|                               |          |          |             |            |
|-------------------------------|----------|----------|-------------|------------|
| N9–H9···O6 <sup>vi</sup>      | 0.89 (2) | 2.42 (2) | 2.894 (3)   | 113.8 (16) |
| N9–H9···O4B                   | 0.89 (2) | 1.72 (2) | 2.532 (4)   | 151 (2)    |
| N9–H9···O4C                   | 0.89 (2) | 2.18 (3) | 2.948 (16)  | 144.5 (19) |
| N9–H9···O5C <sup>vi</sup>     | 0.89 (2) | 2.43 (2) | 2.893 (10)  | 112.6 (17) |
| N9–H9···O6C                   | 0.89 (2) | 2.58 (3) | 3.442 (19)  | 163.7 (18) |
| N11–H11A···O4 <sup>ii</sup>   | 0.93 (3) | 1.93 (3) | 2.774 (4)   | 150 (2)    |
| N11–H11A···O4B <sup>ii</sup>  | 0.93 (3) | 2.64 (3) | 3.454 (10)  | 146 (2)    |
| N11–H11A···O6B <sup>ii</sup>  | 0.93 (3) | 2.55 (3) | 3.436 (6)   | 159 (2)    |
| N11–H11A···O6C <sup>ii</sup>  | 0.93 (3) | 2.18 (3) | 3.041 (11)  | 153 (2)    |
| N11–H11B···N13 <sup>iii</sup> | 0.94 (2) | 2.64 (2) | 3.5344 (18) | 160.3 (17) |
| N11–H11B···O2 <sup>iii</sup>  | 0.94 (2) | 2.19 (2) | 3.1194 (17) | 168.9 (18) |
| N11–H11B···O3 <sup>iii</sup>  | 0.94 (2) | 2.45 (2) | 3.1794 (18) | 134.4 (17) |
| N12–H12A···O5 <sup>v</sup>    | 0.84 (3) | 2.46 (3) | 2.958 (5)   | 119 (2)    |
| N12–H12A···O6 <sup>vi</sup>   | 0.84 (3) | 2.16 (3) | 2.781 (5)   | 131 (2)    |
| N12–H12A···O5B <sup>vi</sup>  | 0.84 (3) | 2.29 (3) | 3.101 (6)   | 162 (2)    |
| N12–H12A···O5C <sup>vi</sup>  | 0.84 (3) | 1.78 (3) | 2.518 (10)  | 144 (3)    |
| N12–H12B···O4B <sup>v</sup>   | 0.81 (2) | 2.34 (2) | 2.754 (4)   | 112 (2)    |

Symmetry code(s): (i)  $x, y+1, z$ ; (ii)  $-x+2, -y+1, -z+1$ ; (iii)  $-x+1, -y+2, -z+2$ ; (iv)  $-x, -y+3, -z+2$ ; (v)  $x+1, y, z$ ; (vi)  $-x+2, -y, -z+1$ .

**Single Crystal XRD data for 4,4',5,5' tetra-amino-3,3'-azo bis-1,2,4-triazolium nitrate monohydrate [TAABTH NO<sub>3</sub>•H<sub>2</sub>O] (4•H<sub>2</sub>O)**

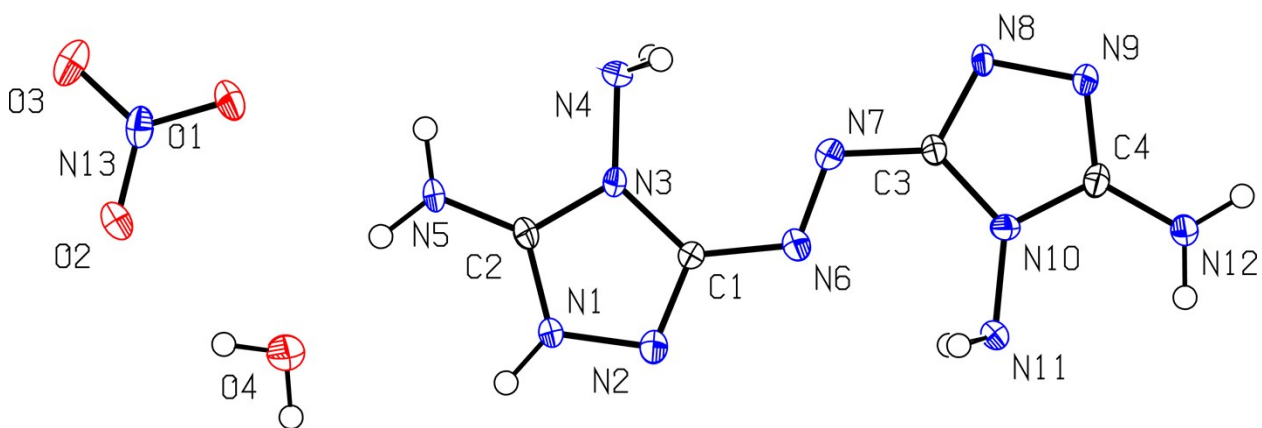

View of the structure of **4•H<sub>2</sub>O**, showing the atom-labelling scheme. Displacement ellipsoids are drawn at the 50% probability level.

The crystal under investigation was found to be non-merohedrally twinned. The orientation matrices for the two components were identified using the program Cell\_Now, with the two components being related by a 180° rotation around the reciprocal axis (1 0 -1). The two components were integrated using Saint and corrected for absorption using twinabs, resulting in the following statistics:

3051 data (1265 unique) involve domain 1 only, mean I/sigma 41.9

3063 data (1243 unique) involve domain 2 only, mean I/sigma 27.5

10648 data (3199 unique) involve 2 domains, mean I/sigma 33.9

The exact twin matrix identified by the integration program was found to be:

0.31844 -0.00008 -0.68292

-0.00022 -1.00000 0.00027

-1.31582 0.00004 -0.31844

The structure was solved using direct methods with only the non-overlapping reflections of component 1. The structure was refined using the hklf 5 routine with all reflections of component 1 (including the overlapping ones), resulting in a BASF value of 0.297(3). The R<sub>int</sub> value given is for all reflections and is based on agreement between observed single and composite intensities and those calculated from refined unique intensities and twin fractions (TWINABS (Sheldrick, 2012)).

## Crystal data

|                                      |                                                         |
|--------------------------------------|---------------------------------------------------------|
| $C_4H_9N_{12} \cdot NO_3 \cdot H_2O$ | $F(000) = 632$                                          |
| $M_r = 305.26$                       | $D_x = 1.752 \text{ Mg m}^{-3}$                         |
| Monoclinic, $P2_1/n$                 | Mo $K\alpha$ radiation, $\lambda = 0.71073 \text{ \AA}$ |
| $a = 7.308 (3) \text{ \AA}$          | Cell parameters from 7494 reflections                   |
| $b = 16.635 (7) \text{ \AA}$         | $\theta = 2.5\text{--}30.6^\circ$                       |
| $c = 9.625 (4) \text{ \AA}$          | $\mu = 0.15 \text{ mm}^{-1}$                            |
| $\beta = 98.404 (14)^\circ$          | $T = 150 \text{ K}$                                     |
| $V = 1157.5 (8) \text{ \AA}^3$       | Plate, orange                                           |
| $Z = 4$                              | $0.33 \times 0.28 \times 0.11 \text{ mm}$               |

## Data collection

|                                                                        |                                                                        |
|------------------------------------------------------------------------|------------------------------------------------------------------------|
| Bruker AXS D8 Quest CMOS diffractometer                                | 16546 measured reflections                                             |
| Radiation source: fine focus sealed tube X-ray source                  | 2799 independent reflections                                           |
| Triumph curved graphite crystal monochromator                          | 2363 reflections with $I > 2\sigma(I)$                                 |
| Detector resolution: $10.4167 \text{ pixels mm}^{-1}$                  | $R_{\text{int}} = 0.123$                                               |
| $\omega$ and phi scans                                                 | $\theta_{\text{max}} = 28.3^\circ$ , $\theta_{\text{min}} = 2.5^\circ$ |
| Absorption correction: multi-scan, TWINABS 2012/1, Krause et al., 2015 | $h = -9 \rightarrow 9$                                                 |
| $T_{\text{min}} = 0.290$ , $T_{\text{max}} = 0.433$                    | $k = 0 \rightarrow 22$                                                 |
|                                                                        | $l = 0 \rightarrow 12$                                                 |

## Refinement

|                                    |                                                                                                                                    |
|------------------------------------|------------------------------------------------------------------------------------------------------------------------------------|
| Refinement on $F^2$                | Primary atom site location: structure-invariant direct methods                                                                     |
| Least-squares matrix: full         | Secondary atom site location: difference Fourier map                                                                               |
| $R[F^2 > 2\sigma(F^2)] = 0.083$    | Hydrogen site location: mixed                                                                                                      |
| $wR(F^2) = 0.237$                  | H atoms treated by a mixture of indep. and constr. refinement                                                                      |
| $S = 1.02$                         | $w = 1/[\sigma^2(F_o^2) + (0.1563P)^2 + 1.613P]$ where $P = (F_o^2 + 2F_c^2)/3$                                                    |
| 2799 reflections                   | $(\Delta/\sigma)_{\text{max}} < 0.001$                                                                                             |
| 210 parameters                     | $\Delta\rho_{\text{max}} = 0.79 \text{ e \AA}^{-3}$                                                                                |
| 9 restraints                       | $\Delta\rho_{\text{min}} = -0.52 \text{ e \AA}^{-3}$                                                                               |
| Extinction coefficient: $0.12 (2)$ | Extinction correction: <i>SHELXL2018/3</i> (Sheldrick, 2018),<br>$F_c^* = kF_c[1 + 0.001x F_c^2 \lambda^3 / \sin(2\theta)]^{-1/4}$ |

## Geometric parameters ( $\text{\AA}$ , $^\circ$ ) for $4 \cdot H_2O$

|       |           |        |            |
|-------|-----------|--------|------------|
| C1–N2 | 1.298 (5) | N4–H4B | 0.877 (19) |
|-------|-----------|--------|------------|

|            |            |               |            |
|------------|------------|---------------|------------|
| C1-N6      | 1.384 (4)  | N5-H5A        | 0.8800     |
| C1-N3      | 1.389 (4)  | N5-H5B        | 0.8800     |
| C2-N5      | 1.302 (5)  | N6-N7         | 1.267 (4)  |
| C2-N1      | 1.341 (5)  | N8-N9         | 1.372 (4)  |
| C2-N3      | 1.344 (4)  | N10-N11       | 1.419 (4)  |
| C3-N8      | 1.337 (5)  | N11-H11A      | 0.873 (19) |
| C3-N7      | 1.368 (4)  | N11-H11B      | 0.877 (19) |
| C3-N10     | 1.376 (4)  | N12-H12A      | 0.8800     |
| C4-N12     | 1.323 (4)  | N12-H12B      | 0.8800     |
| C4-N9      | 1.327 (4)  | N13-O1        | 1.237 (4)  |
| C4-N10     | 1.343 (4)  | N13-O3        | 1.251 (5)  |
| N1-N2      | 1.361 (4)  | N13-O2        | 1.268 (5)  |
| N1-H8      | 0.8800     | O4-H4OA       | 0.864 (19) |
| N3-N4      | 1.413 (4)  | O4-H4OB       | 0.837 (19) |
| N4-H4A     | 0.869 (19) |               |            |
|            |            |               |            |
| N2-C1-N6   | 118.0 (3)  | H4A-N4-H4B    | 103 (3)    |
| N2-C1-N3   | 111.3 (3)  | C2-N5-H5A     | 120.0      |
| N6-C1-N3   | 130.7 (3)  | C2-N5-H5B     | 120.0      |
| N5-C2-N1   | 126.5 (3)  | H5A-N5-H5B    | 120.0      |
| N5-C2-N3   | 127.6 (3)  | N7-N6-C1      | 115.9 (3)  |
| N1-C2-N3   | 105.9 (3)  | N6-N7-C3      | 112.4 (3)  |
| N8-C3-N7   | 120.7 (3)  | C3-N8-N9      | 107.7 (3)  |
| N8-C3-N10  | 108.8 (3)  | C4-N9-N8      | 106.9 (3)  |
| N7-C3-N10  | 130.4 (3)  | C4-N10-C3     | 105.6 (3)  |
| N12-C4-N9  | 125.7 (3)  | C4-N10-N11    | 122.6 (3)  |
| N12-C4-N10 | 123.4 (3)  | C3-N10-N11    | 131.6 (3)  |
| N9-C4-N10  | 110.9 (3)  | N10-N11-H11A  | 101 (3)    |
| C2-N1-N2   | 112.0 (3)  | N10-N11-H11B  | 104 (3)    |
| C2-N1-H8   | 124.0      | H11A-N11-H11B | 102 (4)    |
| N2-N1-H8   | 124.0      | C4-N12-H12A   | 120.0      |
| C1-N2-N1   | 104.5 (3)  | C4-N12-H12B   | 120.0      |
| C2-N3-C1   | 106.3 (3)  | H12A-N12-H12B | 120.0      |
| C2-N3-N4   | 121.5 (3)  | O1-N13-O3     | 121.1 (4)  |
| C1-N3-N4   | 132.2 (3)  | O1-N13-O2     | 119.5 (3)  |
| N3-N4-H4A  | 105 (4)    | O3-N13-O2     | 119.4 (4)  |

|             |            |                |            |
|-------------|------------|----------------|------------|
| N3-N4-H4B   | 104 (4)    | H4OA-O4-H4OB   | 104 (3)    |
|             |            |                |            |
| N5-C2-N1-N2 | 179.6 (4)  | N8-C3-N7-N6    | 177.0 (4)  |
| N3-C2-N1-N2 | -1.3 (5)   | N10-C3-N7-N6   | -1.3 (6)   |
| N6-C1-N2-N1 | 178.7 (3)  | N7-C3-N8-N9    | 179.5 (3)  |
| N3-C1-N2-N1 | -1.5 (5)   | N10-C3-N8-N9   | -1.9 (4)   |
| C2-N1-N2-C1 | 1.7 (5)    | N12-C4-N9-N8   | 177.4 (4)  |
| N5-C2-N3-C1 | 179.4 (4)  | N10-C4-N9-N8   | -0.7 (4)   |
| N1-C2-N3-C1 | 0.3 (4)    | C3-N8-N9-C4    | 1.6 (4)    |
| N5-C2-N3-N4 | -0.5 (7)   | N12-C4-N10-C3  | -178.6 (4) |
| N1-C2-N3-N4 | -179.7 (4) | N9-C4-N10-C3   | -0.4 (4)   |
| N2-C1-N3-C2 | 0.8 (5)    | N12-C4-N10-N11 | 6.6 (6)    |
| N6-C1-N3-C2 | -179.4 (4) | N9-C4-N10-N11  | -175.2 (3) |
| N2-C1-N3-N4 | -179.2 (4) | N8-C3-N10-C4   | 1.4 (4)    |
| N6-C1-N3-N4 | 0.5 (8)    | N7-C3-N10-C4   | 179.8 (4)  |
| N2-C1-N6-N7 | -178.0 (4) | N8-C3-N10-N11  | 175.5 (4)  |
| N3-C1-N6-N7 | 2.3 (6)    | N7-C3-N10-N11  | -6.0 (7)   |
| C1-N6-N7-C3 | -179.0 (3) |                |            |



**Single Crystal XRD data for 4,4',5,5' tetra-amino-3,3'-azo bis-1,2,4-triazolium perchlorate monohydrate (TAABTH ClO<sub>4</sub>·H<sub>2</sub>O) (5·H<sub>2</sub>O)**

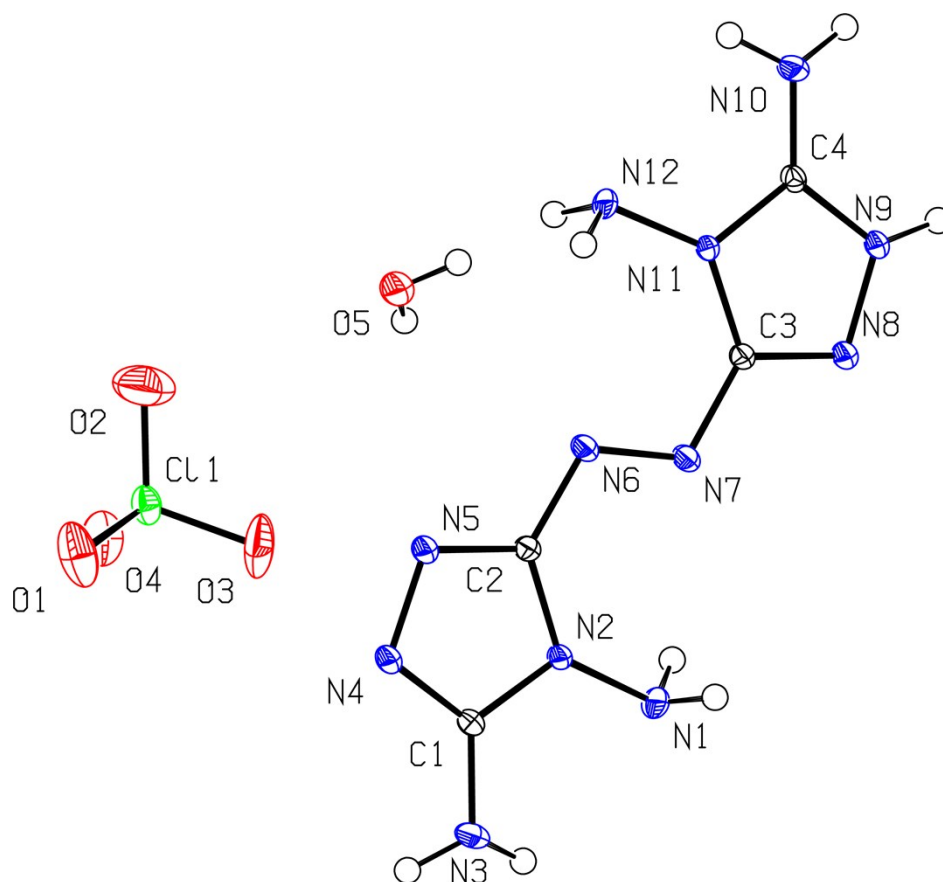

View of the structure of **5·H<sub>2</sub>O**, showing the atom-labelling scheme. Displacement ellipsoids are drawn at the 50% probability level.

**Crystal data**

|                                                                                   |                                                 |
|-----------------------------------------------------------------------------------|-------------------------------------------------|
| C <sub>4</sub> H <sub>9</sub> N <sub>12</sub> ·ClO <sub>4</sub> ·H <sub>2</sub> O | <i>F</i> (000) = 704                            |
| <i>M<sub>r</sub></i> = 342.70                                                     | <i>D<sub>x</sub></i> = 1.748 Mg m <sup>-3</sup> |
| Monoclinic, <i>P</i> 2 <sub>1</sub> / <i>c</i>                                    | Mo <i>K</i> α radiation, λ = 0.71073 Å          |
| <i>a</i> = 7.6478 (4) Å                                                           | Cell parameters from 9515 reflections           |
| <i>b</i> = 18.7539 (10) Å                                                         | θ = 2.8–33.2°                                   |
| <i>c</i> = 9.4649 (5) Å                                                           | μ = 0.35 mm <sup>-1</sup>                       |
| β = 106.3617 (16)°                                                                | <i>T</i> = 150 K                                |
| <i>V</i> = 1302.54 (12) Å <sup>3</sup>                                            | Plate, orange                                   |
| <i>Z</i> = 4                                                                      | 0.35 × 0.33 × 0.16 mm                           |

## Data collection

|                                                                              |                                                                        |
|------------------------------------------------------------------------------|------------------------------------------------------------------------|
| Bruker AXS D8 Quest CMOS diffractometer                                      | 40210 measured reflections                                             |
| Radiation source: fine focus sealed tube X-ray source                        | 4960 independent reflections                                           |
| Triumph curved graphite crystal monochromator                                | 4518 reflections with $I > 2\sigma(I)$                                 |
| Detector resolution: 10.4167 pixels mm <sup>-1</sup>                         | $R_{\text{int}} = 0.031$                                               |
| $\omega$ and phi scans                                                       | $\theta_{\text{max}} = 33.2^\circ$ , $\theta_{\text{min}} = 2.5^\circ$ |
| Absorption correction: multi-scan, <i>SADABS 2016/2, Krause et al., 2015</i> | $h = -10 \rightarrow 11$                                               |
| $T_{\text{min}} = 0.698$ , $T_{\text{max}} = 0.747$                          | $k = -28 \rightarrow 28$                                               |
|                                                                              | $l = -11 \rightarrow 14$                                               |

## Refinement

|                                 |                                                                                  |
|---------------------------------|----------------------------------------------------------------------------------|
| Refinement on $F^2$             | Primary atom site location: structure-invariant direct methods                   |
| Least-squares matrix: full      | Secondary atom site location: difference Fourier map                             |
| $R[F^2 > 2\sigma(F^2)] = 0.032$ | Hydrogen site location: difference Fourier map                                   |
| $wR(F^2) = 0.088$               | All H-atom parameters refined                                                    |
| $S = 1.04$                      | $w = 1/[\sigma^2(F_o^2) + (0.0451P)^2 + 0.5919P]$ where $P = (F_o^2 + 2F_c^2)/3$ |
| 4960 reflections                | $(\Delta/\sigma)_{\text{max}} = 0.001$                                           |
| 243 parameters                  | $\Delta\rho_{\text{max}} = 0.54 \text{ e } \text{\AA}^{-3}$                      |
| 0 restraints                    | $\Delta\rho_{\text{min}} = -0.64 \text{ e } \text{\AA}^{-3}$                     |

## Geometric parameters ( $\text{\AA}$ , $^\circ$ ) for $5\cdot\text{H}_2\text{O}$

|        |             |          |             |
|--------|-------------|----------|-------------|
| C11–O2 | 1.4253 (10) | N3–H3A   | 0.884 (17)  |
| C11–O3 | 1.4321 (8)  | N3–H3B   | 0.872 (17)  |
| C11–O4 | 1.4357 (8)  | C4–N10   | 1.3154 (10) |
| C11–O1 | 1.4445 (8)  | C4–N9    | 1.3431 (10) |
| N1–N2  | 1.4060 (10) | C4–N11   | 1.3558 (10) |
| N1–H1A | 0.906 (17)  | N4–N5    | 1.3741 (10) |
| N1–H1B | 0.881 (16)  | O5–H5A   | 0.83 (2)    |
| C1–N4  | 1.3365 (10) | O5–H5B   | 0.83 (2)    |
| C1–N3  | 1.3481 (11) | N6–N7    | 1.2719 (10) |
| C1–N2  | 1.3535 (10) | N8–N9    | 1.3687 (10) |
| C2–N5  | 1.3167 (10) | N9–H9    | 0.91 (2)    |
| C2–N6  | 1.3797 (10) | N10–H10A | 0.895 (17)  |
| C2–N2  | 1.3873 (10) | N10–H10B | 0.904 (17)  |
| C3–N8  | 1.3096 (10) | N11–N12  | 1.4038 (9)  |

|             |             |               |             |
|-------------|-------------|---------------|-------------|
| C3-N7       | 1.3859 (10) | N12-H12A      | 0.880 (16)  |
| C3-N11      | 1.3923 (10) | N12-H12B      | 0.893 (16)  |
|             |             |               |             |
| O2-C11-O3   | 110.51 (7)  | H3A-N3-H3B    | 117.8 (16)  |
| O2-C11-O4   | 109.82 (7)  | N10-C4-N9     | 127.82 (7)  |
| O3-C11-O4   | 109.86 (6)  | N10-C4-N11    | 125.62 (7)  |
| O2-C11-O1   | 109.55 (7)  | N9-C4-N11     | 106.55 (7)  |
| O3-C11-O1   | 108.38 (6)  | C1-N4-N5      | 107.41 (6)  |
| O4-C11-O1   | 108.68 (5)  | C2-N5-N4      | 107.63 (7)  |
| N2-N1-H1A   | 109.0 (10)  | H5A-O5-H5B    | 109 (2)     |
| N2-N1-H1B   | 107.7 (10)  | N7-N6-C2      | 114.19 (7)  |
| H1A-N1-H1B  | 105.4 (14)  | N6-N7-C3      | 113.31 (7)  |
| N4-C1-N3    | 126.92 (8)  | C3-N8-N9      | 105.25 (7)  |
| N4-C1-N2    | 110.15 (7)  | C4-N9-N8      | 111.15 (7)  |
| N3-C1-N2    | 122.80 (8)  | C4-N9-H9      | 125.4 (12)  |
| N5-C2-N6    | 119.70 (7)  | N8-N9-H9      | 121.1 (12)  |
| N5-C2-N2    | 109.91 (7)  | C4-N10-H10A   | 120.5 (11)  |
| N6-C2-N2    | 130.39 (7)  | C4-N10-H10B   | 117.7 (11)  |
| C1-N2-C2    | 104.89 (7)  | H10A-N10-H10B | 119.5 (15)  |
| C1-N2-N1    | 121.16 (7)  | C4-N11-C3     | 106.21 (6)  |
| C2-N2-N1    | 133.86 (7)  | C4-N11-N12    | 120.50 (7)  |
| N8-C3-N7    | 118.94 (7)  | C3-N11-N12    | 132.94 (7)  |
| N8-C3-N11   | 110.75 (7)  | N11-N12-H12A  | 107.5 (10)  |
| N7-C3-N11   | 130.30 (7)  | N11-N12-H12B  | 107.7 (10)  |
| C1-N3-H3A   | 114.0 (11)  | H12A-N12-H12B | 106.7 (15)  |
| C1-N3-H3B   | 117.2 (11)  |               |             |
|             |             |               |             |
| N4-C1-N2-C2 | -0.14 (9)   | N8-C3-N7-N6   | -175.41 (7) |
| N3-C1-N2-C2 | -176.29 (8) | N11-C3-N7-N6  | 5.15 (12)   |
| N4-C1-N2-N1 | -177.19 (7) | N7-C3-N8-N9   | 179.83 (7)  |
| N3-C1-N2-N1 | 6.65 (12)   | N11-C3-N8-N9  | -0.62 (9)   |
| N5-C2-N2-C1 | -0.47 (9)   | N10-C4-N9-N8  | -177.97 (8) |
| N6-C2-N2-C1 | 179.59 (8)  | N11-C4-N9-N8  | 2.63 (9)    |
| N5-C2-N2-N1 | 176.03 (8)  | C3-N8-N9-C4   | -1.25 (9)   |
| N6-C2-N2-N1 | -3.90 (15)  | N10-C4-N11-C3 | 177.73 (8)  |
| N3-C1-N4-N5 | 176.62 (8)  | N9-C4-N11-C3  | -2.85 (9)   |

|             |             |                |             |
|-------------|-------------|----------------|-------------|
| N2–C1–N4–N5 | 0.66 (9)    | N10–C4–N11–N12 | 3.63 (12)   |
| N6–C2–N5–N4 | -179.18 (7) | N9–C4–N11–N12  | -176.95 (7) |
| N2–C2–N5–N4 | 0.88 (9)    | N8–C3–N11–C4   | 2.21 (9)    |
| C1–N4–N5–C2 | -0.95 (9)   | N7–C3–N11–C4   | -178.31 (8) |
| N5–C2–N6–N7 | 174.26 (8)  | N8–C3–N11–N12  | 175.25 (8)  |
| N2–C2–N6–N7 | -5.81 (13)  | N7–C3–N11–N12  | -5.26 (14)  |
| C2–N6–N7–C3 | 179.78 (7)  |                |             |

### Hydrogen-bond geometry (Å, °) for 5•H<sub>2</sub>O

| <i>D</i> –H··· <i>A</i>                | <i>D</i> –H | H··· <i>A</i> | <i>D</i> ··· <i>A</i> | <i>D</i> –H··· <i>A</i> |
|----------------------------------------|-------------|---------------|-----------------------|-------------------------|
| N1–H1 <i>A</i> ···O2 <sup>i</sup>      | 0.906 (17)  | 2.450 (16)    | 3.0165 (14)           | 120.8 (13)              |
| N1–H1 <i>A</i> ···O4 <sup>ii</sup>     | 0.906 (17)  | 2.411 (16)    | 3.0403 (13)           | 126.6 (13)              |
| N1–H1 <i>B</i> ···N5 <sup>iii</sup>    | 0.881 (16)  | 2.277 (16)    | 3.1151 (11)           | 159.0 (14)              |
| N3–H3 <i>B</i> ···O3 <sup>iv</sup>     | 0.872 (17)  | 2.124 (17)    | 2.9637 (12)           | 161.4 (16)              |
| O5–H5 <i>A</i> ···N3 <sup>iii</sup>    | 0.83 (2)    | 2.30 (2)      | 3.0768 (12)           | 154.8 (19)              |
| O5–H5 <i>B</i> ···C11 <sup>v</sup>     | 0.83 (2)    | 2.82 (2)      | 3.6062 (8)            | 159 (2)                 |
| O5–H5 <i>B</i> ···O4 <sup>v</sup>      | 0.83 (2)    | 2.63 (2)      | 3.2144 (12)           | 128.7 (19)              |
| O5–H5 <i>B</i> ···O1 <sup>v</sup>      | 0.83 (2)    | 2.00 (2)      | 2.8277 (12)           | 172 (2)                 |
| N9–H9···N4 <sup>vi</sup>               | 0.91 (2)    | 1.83 (2)      | 2.7416 (10)           | 175.2 (18)              |
| N10–H10 <i>A</i> ···O5 <sup>v</sup>    | 0.895 (17)  | 1.978 (17)    | 2.8365 (11)           | 160.2 (16)              |
| N10–H10 <i>B</i> ···O5 <sup>vii</sup>  | 0.904 (17)  | 2.018 (17)    | 2.8576 (11)           | 153.9 (15)              |
| N12–H12 <i>A</i> ···N8 <sup>iv</sup>   | 0.880 (16)  | 2.285 (16)    | 3.0957 (10)           | 153.2 (14)              |
| N12–H12 <i>B</i> ···O2 <sup>viii</sup> | 0.893 (16)  | 2.584 (16)    | 3.2013 (15)           | 126.9 (13)              |
| N12–H12 <i>B</i> ···O1 <sup>v</sup>    | 0.893 (16)  | 2.470 (16)    | 3.0487 (11)           | 122.9 (13)              |

Symmetry codes: (i)  $-x+1, y-1/2, -z+1/2$ ; (ii)  $x+1, -y+1/2, z+1/2$ ; (iii)  $x, -y+1/2, z-1/2$ ; (iv)  $x, -y+1/2, z+1/2$ ; (v)  $x+1, y, z$ ; (vi)  $x+1, -y+1/2, z-1/2$ ; (vii)  $-x+2, -y+1, -z+1$ ; (viii)  $-x+1, -y+1, -z+1$ .

**Single Crystal XRD data for 4,4',5,5' tetra-amino-3,3'-azo bis-1,2,4-triazolium perchlorate (TAABTH ClO<sub>4</sub>) (5)**

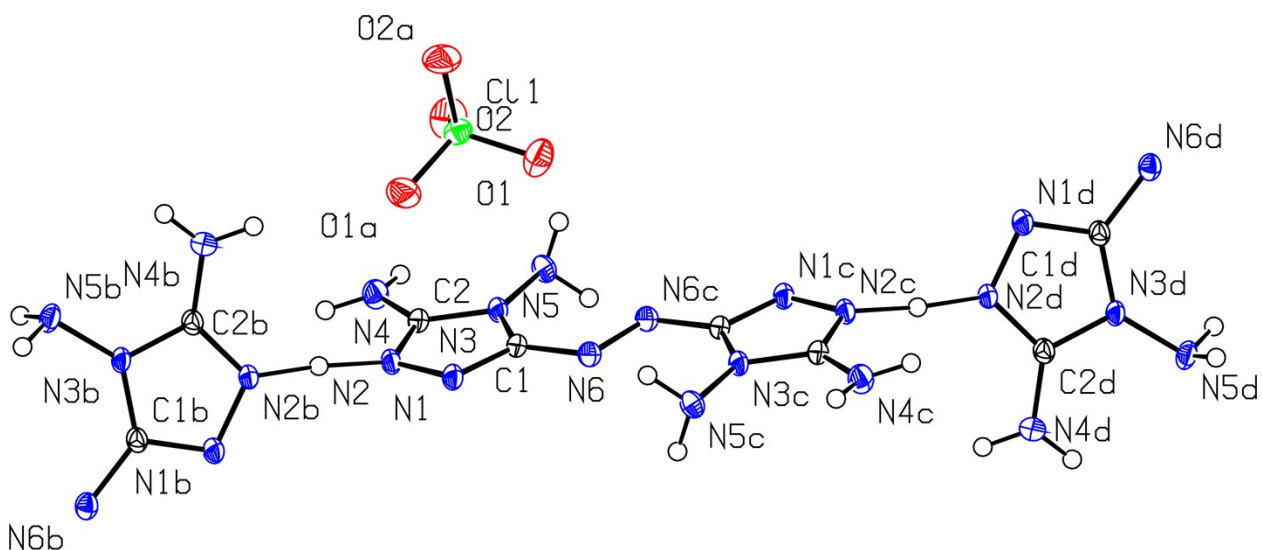

**Crystal data**

|                                |                                                         |
|--------------------------------|---------------------------------------------------------|
| $C_4H_9N_{12} \cdot ClO_4$     | $F(000) = 332$                                          |
| $M_r = 324.68$                 | $D_x = 1.821 \text{ Mg m}^{-3}$                         |
| Monoclinic, $P2_1/c$           | Cu $K\alpha$ radiation, $\lambda = 1.54178 \text{ \AA}$ |
| $a = 7.4095 (6) \text{ \AA}$   | Cell parameters from 2733 reflections                   |
| $b = 8.6931 (9) \text{ \AA}$   | $\theta = 5.1\text{--}79.2^\circ$                       |
| $c = 9.5541 (7) \text{ \AA}$   | $\mu = 3.34 \text{ mm}^{-1}$                            |
| $\beta = 105.797 (5)^\circ$    | $T = 150 \text{ K}$                                     |
| $V = 592.15 (9) \text{ \AA}^3$ | Needle, yellow                                          |
| $Z = 2$                        |                                                         |

**Data collection**

|                                                                |                                                                     |
|----------------------------------------------------------------|---------------------------------------------------------------------|
| Bruker AXS D8 Quest diffractometer with PhotonII CPAD detector | 4375 measured reflections                                           |
| Radiation source: I-mu-S microsource X-ray tube                | 1237 independent reflections                                        |
| Laterally graded multilayer (Goebel) mirror monochromator      | 1076 reflections with $I > 2\sigma(I)$                              |
| Detector resolution: $7.4074 \text{ pixels mm}^{-1}$           | $R_{\text{int}} = 0.062$                                            |
| $\omega$ and phi scans                                         | $\theta_{\text{max}} = 80.9^\circ, \theta_{\text{min}} = 5.1^\circ$ |

|                                                                              |                          |
|------------------------------------------------------------------------------|--------------------------|
| Absorption correction: multi-scan, <i>SADABS 2016/2, Krause et al., 2015</i> | $h = -9 \rightarrow 8$   |
| $T_{\min} = 0.398, T_{\max} = 0.754$                                         | $k = -10 \rightarrow 11$ |
|                                                                              | $l = -9 \rightarrow 11$  |

### Refinement

|                                 |                                                                                  |
|---------------------------------|----------------------------------------------------------------------------------|
| Refinement on $F^2$             | Primary atom site location: structure-invariant direct methods                   |
| Least-squares matrix: full      | Secondary atom site location: difference Fourier map                             |
| $R[F^2 > 2\sigma(F^2)] = 0.053$ | Hydrogen site location: difference Fourier map                                   |
| $wR(F^2) = 0.161$               | All H-atom parameters refined                                                    |
| $S = 1.09$                      | $w = 1/[\sigma^2(F_o^2) + (0.0886P)^2 + 0.7436P]$ where $P = (F_o^2 + 2F_c^2)/3$ |
| 1237 reflections                | $(\Delta/\sigma)_{\max} < 0.001$                                                 |
| 114 parameters                  | $\Delta\rho_{\max} = 0.42 \text{ e } \text{\AA}^{-3}$                            |
| 6 restraints                    | $\Delta\rho_{\min} = -0.54 \text{ e } \text{\AA}^{-3}$                           |

### Geometric parameters ( $\text{\AA}$ , $^\circ$ ) for 5

|                                      |             |                     |           |
|--------------------------------------|-------------|---------------------|-----------|
| C11–O2 <sup>i</sup>                  | 1.431 (2)   | N2–H2               | 1.288 (6) |
| C11–O2                               | 1.431 (2)   | C2–N4               | 1.329 (4) |
| C11–O1                               | 1.432 (2)   | C2–N3               | 1.347 (3) |
| C11–O1 <sup>i</sup>                  | 1.432 (2)   | N5–N3               | 1.406 (3) |
| C1–N1                                | 1.306 (3)   | N5–H5A              | 0.90 (3)  |
| C1–N6                                | 1.385 (4)   | N5–H5B              | 0.89 (3)  |
| C1–N3                                | 1.388 (3)   | N4–H4A              | 0.88 (3)  |
| N1–N2                                | 1.368 (3)   | N4–H4B              | 0.89 (2)  |
| N2–C2                                | 1.336 (3)   | N6–N6 <sup>ii</sup> | 1.265 (4) |
|                                      |             |                     |           |
| O2 <sup>i</sup> –C11–O2              | 109.6 (2)   | N4–C2–N2            | 126.7 (2) |
| O2 <sup>i</sup> –C11–O1              | 110.09 (15) | N4–C2–N3            | 125.1 (2) |
| O2–C11–O1                            | 108.99 (14) | N2–C2–N3            | 108.2 (2) |
| O2 <sup>i</sup> –C11–O1 <sup>i</sup> | 108.99 (14) | N3–N5–H5A           | 108 (3)   |
| O2–C11–O1 <sup>i</sup>               | 110.09 (15) | N3–N5–H5B           | 109 (3)   |
| O1–C11–O1 <sup>i</sup>               | 109.0 (2)   | H5A–N5–H5B          | 108 (4)   |
| N1–C1–N6                             | 118.6 (2)   | C2–N4–H4A           | 118 (3)   |
| N1–C1–N3                             | 110.6 (2)   | C2–N4–H4B           | 120 (3)   |
| N6–C1–N3                             | 130.8 (2)   | H4A–N4–H4B          | 119 (4)   |
| C1–N1–N2                             | 106.0 (2)   | C2–N3–C1            | 105.5 (2) |

|             |            |                           |            |
|-------------|------------|---------------------------|------------|
| C2-N2-N1    | 109.6 (2)  | C2-N3-N5                  | 121.6 (2)  |
| C2-N2-H2    | 129 (4)    | C1-N3-N5                  | 132.9 (2)  |
| N1-N2-H2    | 118 (3)    | N6 <sup>ii</sup> -N6-C1   | 113.3 (3)  |
|             |            |                           |            |
| N6-C1-N1-N2 | -178.2 (2) | N2-C2-N3-N5               | 179.6 (2)  |
| N3-C1-N1-N2 | 0.0 (3)    | N1-C1-N3-C2               | 0.5 (3)    |
| C1-N1-N2-C2 | -0.5 (3)   | N6-C1-N3-C2               | 178.4 (3)  |
| N1-N2-C2-N4 | -178.9 (3) | N1-C1-N3-N5               | -179.9 (3) |
| N1-N2-C2-N3 | 0.8 (3)    | N6-C1-N3-N5               | -2.0 (5)   |
| N4-C2-N3-C1 | 178.9 (3)  | N1-C1-N6-N6 <sup>ii</sup> | -177.2 (3) |
| N2-C2-N3-C1 | -0.8 (3)   | N3-C1-N6-N6 <sup>ii</sup> | 5.0 (5)    |
| N4-C2-N3-N5 | -0.7 (4)   |                           |            |

Symmetry codes: (i)  $-x+1, y, -z+1/2$ ; (ii)  $-x+1, -y, -z$ .

**Single Crystal XRD data for 4,4',5,5' tetra-amino-3,3'-azo bis-1,2,4-triazolium 5-nitrimino-1,2,3,4-tetrazolate tetrahydrate (TAABTH  $\text{CHN}_6\text{O}_2 \cdot 4\text{H}_2\text{O}$ ) ( $6 \cdot 4\text{H}_2\text{O}$ )**

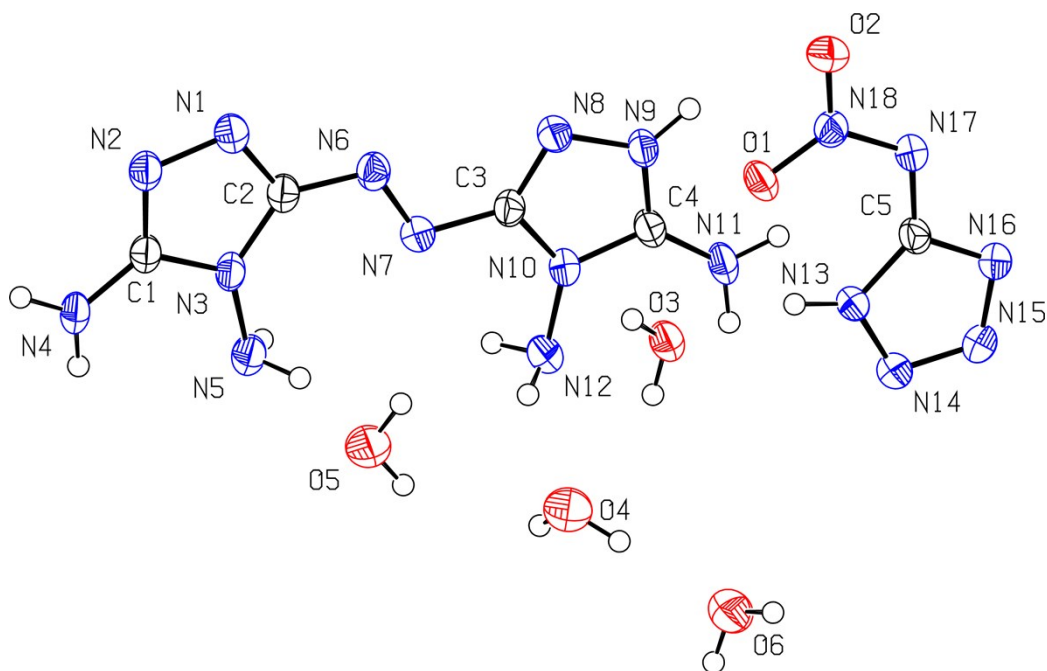

View of the structure of  $6 \cdot 4\text{H}_2\text{O}$ , showing the atom-labelling scheme. Displacement ellipsoids are drawn at the 50% probability level.

**Crystal data**

|                                                                                              |                                                         |
|----------------------------------------------------------------------------------------------|---------------------------------------------------------|
| $\text{C}_4\text{H}_9\text{N}_{12} \cdot \text{CHN}_6\text{O}_2 \cdot 4(\text{H}_2\text{O})$ | $F(000) = 888$                                          |
| $M_r = 426.37$                                                                               | $D_x = 1.622 \text{ Mg m}^{-3}$                         |
| Monoclinic, $P2_1/n$                                                                         | Cu $K\alpha$ radiation, $\lambda = 1.54178 \text{ \AA}$ |
| $a = 6.9012 (4) \text{ \AA}$                                                                 | Cell parameters from 6846 reflections                   |
| $b = 15.0471 (8) \text{ \AA}$                                                                | $\theta = 2.6\text{--}79.9^\circ$                       |
| $c = 16.8109 (10) \text{ \AA}$                                                               | $\mu = 1.24 \text{ mm}^{-1}$                            |
| $\beta = 90.012 (4)^\circ$                                                                   | $T = 150 \text{ K}$                                     |
| $V = 1745.69 (17) \text{ \AA}^3$                                                             | Needle, red                                             |
| $Z = 4$                                                                                      | $0.55 \times 0.05 \times 0.03 \text{ mm}$               |

**Data collection**

|                                                                |                                        |
|----------------------------------------------------------------|----------------------------------------|
| Bruker AXS D8 Quest diffractometer with PhotonII CPAD detector | 13925 measured reflections             |
| Radiation source: I-mu-S microsource X-ray tube                | 3710 independent reflections           |
| Laterally graded multilayer (Goebel) mirror monochromator      | 3087 reflections with $I > 2\sigma(I)$ |



|                                                                              |                                                                        |
|------------------------------------------------------------------------------|------------------------------------------------------------------------|
| Detector resolution: 7.4074 pixels mm <sup>-1</sup>                          | $R_{\text{int}} = 0.076$                                               |
| $\omega$ and phi scans                                                       | $\theta_{\text{max}} = 80.3^\circ$ , $\theta_{\text{min}} = 2.6^\circ$ |
| Absorption correction: multi-scan, <i>SADABS 2016/2, Krause et al., 2015</i> | $h = -5 \rightarrow 8$                                                 |
| $T_{\text{min}} = 0.625$ , $T_{\text{max}} = 0.754$                          | $k = -19 \rightarrow 18$                                               |
|                                                                              | $l = -21 \rightarrow 21$                                               |

### Refinement

|                                 |                                                                                  |
|---------------------------------|----------------------------------------------------------------------------------|
| Refinement on $F^2$             | Primary atom site location: structure-invariant direct methods                   |
| Least-squares matrix: full      | Secondary atom site location: difference Fourier map                             |
| $R[F^2 > 2\sigma(F^2)] = 0.052$ | Hydrogen site location: mixed                                                    |
| $wR(F^2) = 0.144$               | H atoms treated by a mixture of indep. and constr. refinement                    |
| $S = 1.09$                      | $w = 1/[\sigma^2(F_o^2) + (0.0582P)^2 + 0.7079P]$ where $P = (F_o^2 + 2F_c^2)/3$ |
| 3710 reflections                | $(\Delta/\sigma)_{\text{max}} < 0.001$                                           |
| 311 parameters                  | $\Delta\rho_{\text{max}} = 0.40 \text{ e } \text{\AA}^{-3}$                      |
| 20 restraints                   | $\Delta\rho_{\text{min}} = -0.29 \text{ e } \text{\AA}^{-3}$                     |

### Geometric parameters ( $\text{\AA}$ , $^\circ$ ) for 6•4H2O

|        |            |          |            |
|--------|------------|----------|------------|
| C1–N4  | 1.324 (4)  | N8–N9    | 1.385 (4)  |
| C1–N2  | 1.329 (4)  | N9–H9    | 0.8800     |
| C1–N3  | 1.361 (4)  | N10–N12  | 1.389 (4)  |
| C2–N1  | 1.325 (4)  | N11–H11A | 0.885 (19) |
| C2–N6  | 1.364 (4)  | N11–H11B | 0.886 (19) |
| C2–N3  | 1.389 (4)  | N12–H12A | 0.878 (19) |
| C3–N8  | 1.301 (4)  | N12–H12B | 0.887 (19) |
| C3–N10 | 1.372 (4)  | N13–N14  | 1.348 (4)  |
| C3–N7  | 1.394 (4)  | N13–H13  | 0.8800     |
| C4–N11 | 1.314 (4)  | N14–N15  | 1.296 (4)  |
| C4–N9  | 1.327 (5)  | N15–N16  | 1.340 (4)  |
| C4–N10 | 1.352 (4)  | N17–N18  | 1.324 (4)  |
| C5–N16 | 1.338 (4)  | N18–O2   | 1.237 (4)  |
| C5–N13 | 1.348 (4)  | N18–O1   | 1.258 (4)  |
| C5–N17 | 1.361 (4)  | O3–H3O1  | 0.826 (19) |
| N1–N2  | 1.360 (4)  | O3–H3O2  | 0.824 (18) |
| N3–N5  | 1.413 (4)  | O4–H4O1  | 0.867 (19) |
| N4–H4A | 0.887 (19) | O4–H4O2  | 0.862 (19) |

|             |            |               |            |
|-------------|------------|---------------|------------|
| N4-H4B      | 0.885 (19) | O5-H5O1       | 0.838 (19) |
| N5-H5A      | 0.873 (19) | O5-H5O2       | 0.844 (19) |
| N5-H5B      | 0.875 (19) | O6-H6O1       | 0.815 (19) |
| N6-N7       | 1.281 (4)  | O6-H6O2       | 0.843 (19) |
|             |            |               |            |
| N4-C1-N2    | 126.2 (3)  | C3-N8-N9      | 103.3 (3)  |
| N4-C1-N3    | 123.4 (3)  | C4-N9-N8      | 112.4 (3)  |
| N2-C1-N3    | 110.4 (3)  | C4-N9-H9      | 123.8      |
| N1-C2-N6    | 119.5 (3)  | N8-N9-H9      | 123.8      |
| N1-C2-N3    | 109.0 (2)  | C4-N10-C3     | 107.0 (3)  |
| N6-C2-N3    | 131.5 (3)  | C4-N10-N12    | 122.7 (3)  |
| N8-C3-N10   | 111.8 (3)  | C3-N10-N12    | 130.2 (3)  |
| N8-C3-N7    | 129.8 (3)  | C4-N11-H11A   | 122 (3)    |
| N10-C3-N7   | 118.4 (3)  | C4-N11-H11B   | 125 (3)    |
| N11-C4-N9   | 128.6 (3)  | H11A-N11-H11B | 111 (4)    |
| N11-C4-N10  | 126.0 (3)  | N10-N12-H12A  | 101 (3)    |
| N9-C4-N10   | 105.4 (3)  | N10-N12-H12B  | 112 (3)    |
| N16-C5-N13  | 106.9 (3)  | H12A-N12-H12B | 101 (4)    |
| N16-C5-N17  | 118.6 (3)  | C5-N13-N14    | 109.0 (2)  |
| N13-C5-N17  | 134.5 (3)  | C5-N13-H13    | 125.5      |
| C2-N1-N2    | 108.4 (3)  | N14-N13-H13   | 125.5      |
| C1-N2-N1    | 107.4 (3)  | N15-N14-N13   | 106.2 (3)  |
| C1-N3-C2    | 104.7 (3)  | N14-N15-N16   | 111.2 (3)  |
| C1-N3-N5    | 121.7 (3)  | C5-N16-N15    | 106.7 (3)  |
| C2-N3-N5    | 133.6 (2)  | N18-N17-C5    | 117.2 (3)  |
| C1-N4-H4A   | 122 (3)    | O2-N18-O1     | 121.6 (3)  |
| C1-N4-H4B   | 120 (3)    | O2-N18-N17    | 117.6 (3)  |
| H4A-N4-H4B  | 118 (4)    | O1-N18-N17    | 120.8 (3)  |
| N3-N5-H5A   | 107 (3)    | H3O1-O3-H3O2  | 113 (3)    |
| N3-N5-H5B   | 107 (3)    | H4O1-O4-H4O2  | 106 (3)    |
| H5A-N5-H5B  | 106 (4)    | H5O1-O5-H5O2  | 109 (3)    |
| N7-N6-C2    | 114.7 (3)  | H6O1-O6-H6O2  | 114 (3)    |
| N6-N7-C3    | 111.9 (3)  |               |            |
|             |            |               |            |
| N6-C2-N1-N2 | -179.8 (3) | N10-C4-N9-N8  | 0.4 (3)    |
| N3-C2-N1-N2 | -0.1 (3)   | C3-N8-N9-C4   | 0.2 (3)    |

|              |            |                 |            |
|--------------|------------|-----------------|------------|
| N4-C1-N2-N1  | 178.9 (3)  | N11-C4-N10-C3   | 179.5 (3)  |
| N3-C1-N2-N1  | 0.4 (3)    | N9-C4-N10-C3    | -0.9 (3)   |
| C2-N1-N2-C1  | -0.2 (3)   | N11-C4-N10-N12  | 3.0 (5)    |
| N4-C1-N3-C2  | -179.0 (3) | N9-C4-N10-N12   | -177.4 (3) |
| N2-C1-N3-C2  | -0.5 (3)   | N8-C3-N10-C4    | 1.1 (4)    |
| N4-C1-N3-N5  | 2.0 (5)    | N7-C3-N10-C4    | -178.2 (3) |
| N2-C1-N3-N5  | -179.5 (3) | N8-C3-N10-N12   | 177.3 (3)  |
| N1-C2-N3-C1  | 0.4 (3)    | N7-C3-N10-N12   | -2.0 (5)   |
| N6-C2-N3-C1  | -180.0 (3) | N16-C5-N13-N14  | 0.1 (3)    |
| N1-C2-N3-N5  | 179.2 (3)  | N17-C5-N13-N14  | 178.9 (4)  |
| N6-C2-N3-N5  | -1.2 (6)   | C5-N13-N14-N15  | -0.1 (3)   |
| N1-C2-N6-N7  | 179.2 (3)  | N13-N14-N15-N16 | 0.1 (4)    |
| N3-C2-N6-N7  | -0.4 (5)   | N13-C5-N16-N15  | 0.0 (3)    |
| C2-N6-N7-C3  | -179.1 (3) | N17-C5-N16-N15  | -179.1 (3) |
| N8-C3-N7-N6  | 3.1 (5)    | N14-N15-N16-C5  | 0.0 (4)    |
| N10-C3-N7-N6 | -177.8 (3) | N16-C5-N17-N18  | 179.4 (3)  |
| N10-C3-N8-N9 | -0.8 (3)   | N13-C5-N17-N18  | 0.7 (6)    |
| N7-C3-N8-N9  | 178.4 (3)  | C5-N17-N18-O2   | 178.9 (3)  |
| N11-C4-N9-N8 | -180.0 (3) | C5-N17-N18-O1   | -1.1 (5)   |

**Single Crystal XRD data for 4,4',5,5' tetra-amino-3,3'-azo bis-1,2,4-triazolium 5 nitrimino-1,2,3,4-tetrazolate methanolate (TAABTH CHN<sub>6</sub>O<sub>2</sub>·MeOH)[(6·MeOH ·0.5(C<sub>4</sub>H<sub>8</sub>N<sub>12</sub>)]**

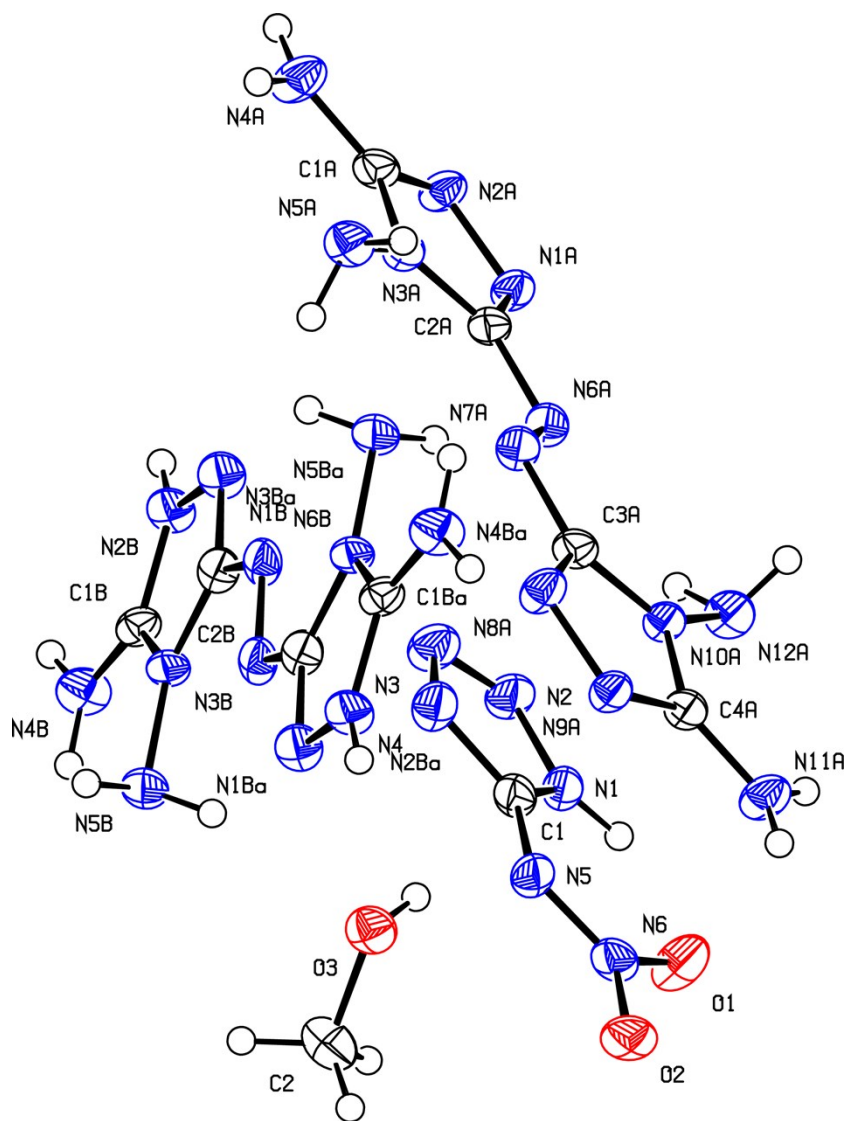

View of the structure of **6·MeOH ·0.5C<sub>4</sub>H<sub>8</sub>N<sub>12</sub>**, showing the atom-labelling scheme. Displacement ellipsoids are drawn at the 50% probability level. Symmetry code: (a)  $1 - x, 1 - y, 1 - z$ .

**Crystal data**

|                                                                                                                                                        |                                                 |
|--------------------------------------------------------------------------------------------------------------------------------------------------------|-------------------------------------------------|
| C <sub>4</sub> H <sub>8</sub> N <sub>12</sub> ·0.5(C <sub>4</sub> H <sub>10</sub> N <sub>12</sub> )·CHN <sub>6</sub> O <sub>2</sub> ·CH <sub>4</sub> O | Z = 2                                           |
| <i>M<sub>r</sub></i> = 498.46                                                                                                                          | <i>F</i> (000) = 516                            |
| Triclinic, <i>P</i> $\bar{1}$                                                                                                                          | <i>D<sub>x</sub></i> = 1.669 Mg m <sup>-3</sup> |
| <i>a</i> = 8.3500 (11) Å                                                                                                                               | Cu <i>K</i> α radiation, λ = 1.54178 Å          |
| <i>b</i> = 10.7574 (17) Å                                                                                                                              | Cell parameters from 2437 reflections           |

|                                |                                           |
|--------------------------------|-------------------------------------------|
| $c = 12.0071 (16) \text{ \AA}$ | $\theta = 4.0\text{--}69.9^\circ$         |
| $\alpha = 104.533 (10)^\circ$  | $\mu = 1.17 \text{ mm}^{-1}$              |
| $\beta = 107.050 (9)^\circ$    | $T = 150 \text{ K}$                       |
| $\gamma = 91.66 (1)^\circ$     | Needle, yellow                            |
| $V = 992.0 (3) \text{ \AA}^3$  | $0.20 \times 0.03 \times 0.01 \text{ mm}$ |

### Data collection

|                                                                              |                                                                        |
|------------------------------------------------------------------------------|------------------------------------------------------------------------|
| Bruker AXS D8 Quest diffractometer with PhotonII CPAD detector               | 9304 measured reflections                                              |
| Radiation source: I-mu-S microsource X-ray tube                              | 3831 independent reflections                                           |
| Laterally graded multilayer (Goebel) mirror monochromator                    | 2108 reflections with $I > 2\sigma(I)$                                 |
| Detector resolution: $7.4074 \text{ pixels mm}^{-1}$                         | $R_{\text{int}} = 0.117$                                               |
| $\omega$ and $\phi$ scans                                                    | $\theta_{\text{max}} = 80.1^\circ$ , $\theta_{\text{min}} = 4.0^\circ$ |
| Absorption correction: multi-scan, <i>SADABS 2016/2, Krause et al., 2015</i> | $h = -9 \rightarrow 10$                                                |
| $T_{\text{min}} = 0.613$ , $T_{\text{max}} = 0.754$                          | $k = -12 \rightarrow 13$                                               |
|                                                                              | $l = -15 \rightarrow 15$                                               |

### Refinement

|                                 |                                                                |
|---------------------------------|----------------------------------------------------------------|
| Refinement on $F^2$             | Primary atom site location: structure-invariant direct methods |
| Least-squares matrix: full      | Secondary atom site location: difference Fourier map           |
| $R[F^2 > 2\sigma(F^2)] = 0.061$ | Hydrogen site location: mixed                                  |
| $wR(F^2) = 0.165$               | H atoms treated by a mixture of indep. and constr. refinement  |
| $S = 0.90$                      | $w = 1/[\sigma^2(F_o^2)]$ where $P = (F_o^2 + 2F_c^2)/3$       |
| 3831 reflections                | $(\Delta/\sigma)_{\text{max}} < 0.001$                         |
| 359 parameters                  | $\Delta\rho_{\text{max}} = 0.46 \text{ e \AA}^{-3}$            |
| 12 restraints                   | $\Delta\rho_{\text{min}} = -0.41 \text{ e \AA}^{-3}$           |

### Geometric parameters ( $\text{\AA}$ , $^\circ$ ) for $6 \cdot \text{MeOH} \cdot 0.5\text{C}_4\text{H}_8\text{N}_{12}$

|        |           |         |            |
|--------|-----------|---------|------------|
| C1–N4  | 1.333 (5) | N1A–N2A | 1.370 (4)  |
| C1–N1  | 1.353 (4) | N3A–N5A | 1.414 (4)  |
| C1–N5  | 1.364 (4) | N4A–H4A | 0.874 (19) |
| C2–O3  | 1.428 (4) | N4A–H4B | 0.896 (19) |
| C2–H2C | 0.9800    | N5A–H5A | 0.907 (19) |
| C2–H2D | 0.9800    | N5A–H5B | 0.888 (19) |
| C2–H2E | 0.9800    | N6A–N7A | 1.277 (3)  |
| N1–N2  | 1.337 (4) | N8A–N9A | 1.360 (4)  |

|            |           |                      |            |
|------------|-----------|----------------------|------------|
| N1-H1      | 0.8800    | N10A-N12A            | 1.413 (4)  |
| N2-N3      | 1.306 (4) | N11A-H11A            | 0.877 (19) |
| N3-N4      | 1.355 (4) | N11A-H11B            | 0.889 (19) |
| N5-N6      | 1.314 (4) | N12A-H12A            | 0.888 (19) |
| N6-O2      | 1.253 (3) | N12A-H12B            | 0.895 (19) |
| N6-O1      | 1.262 (4) | C1B-N4B              | 1.329 (4)  |
| O3-H3      | 0.8400    | C1B-N2B              | 1.334 (4)  |
| C1A-N4A    | 1.319 (5) | C1B-N3B              | 1.347 (4)  |
| C1A-N2A    | 1.344 (4) | C2B-N1B              | 1.300 (4)  |
| C1A-N3A    | 1.358 (4) | C2B-N6B              | 1.381 (4)  |
| C2A-N1A    | 1.315 (4) | C2B-N3B              | 1.389 (4)  |
| C2A-N6A    | 1.370 (5) | N1B-N2B              | 1.370 (4)  |
| C2A-N3A    | 1.383 (4) | N2B-H2B              | 0.8800     |
| C3A-N8A    | 1.313 (4) | N3B-N5B              | 1.405 (3)  |
| C3A-N7A    | 1.379 (5) | N4B-H4C              | 0.875 (19) |
| C3A-N10A   | 1.384 (4) | N4B-H4D              | 0.877 (19) |
| C4A-N11A   | 1.314 (5) | N5B-H5C              | 0.892 (19) |
| C4A-N9A    | 1.345 (4) | N5B-H5D              | 0.891 (19) |
| C4A-N10A   | 1.349 (4) | N6B-N6B <sup>i</sup> | 1.269 (5)  |
|            |           |                      |            |
| N4-C1-N1   | 108.0 (3) | C1A-N4A-H4B          | 123 (3)    |
| N4-C1-N5   | 119.8 (3) | H4A-N4A-H4B          | 120 (4)    |
| N1-C1-N5   | 132.2 (4) | N3A-N5A-H5A          | 98 (2)     |
| O3-C2-H2C  | 109.5     | N3A-N5A-H5B          | 113 (3)    |
| O3-C2-H2D  | 109.5     | H5A-N5A-H5B          | 110 (4)    |
| H2C-C2-H2D | 109.5     | N7A-N6A-C2A          | 114.2 (3)  |
| O3-C2-H2E  | 109.5     | N6A-N7A-C3A          | 113.7 (3)  |
| H2C-C2-H2E | 109.5     | C3A-N8A-N9A          | 107.1 (3)  |
| H2D-C2-H2E | 109.5     | C4A-N9A-N8A          | 109.0 (3)  |
| N2-N1-C1   | 108.8 (3) | C4A-N10A-C3A         | 106.1 (3)  |
| N2-N1-H1   | 125.6     | C4A-N10A-N12A        | 122.0 (3)  |
| C1-N1-H1   | 125.6     | C3A-N10A-N12A        | 131.9 (3)  |
| N3-N2-N1   | 106.4 (3) | C4A-N11A-H11A        | 111 (3)    |
| N2-N3-N4   | 111.2 (3) | C4A-N11A-H11B        | 117 (3)    |
| C1-N4-N3   | 105.6 (3) | H11A-N11A-H11B       | 130 (4)    |
| N6-N5-C1   | 116.6 (3) | N10A-N12A-H12A       | 107 (3)    |

|                 |            |                           |            |
|-----------------|------------|---------------------------|------------|
| O2-N6-O1        | 119.6 (3)  | N10A-N12A-H12B            | 106 (3)    |
| O2-N6-N5        | 118.1 (3)  | H12A-N12A-H12B            | 109 (4)    |
| O1-N6-N5        | 122.3 (3)  | N4B-C1B-N2B               | 127.4 (3)  |
| C2-O3-H3        | 109.5      | N4B-C1B-N3B               | 124.8 (3)  |
| N4A-C1A-N2A     | 127.1 (3)  | N2B-C1B-N3B               | 107.8 (3)  |
| N4A-C1A-N3A     | 123.1 (3)  | N1B-C2B-N6B               | 119.4 (3)  |
| N2A-C1A-N3A     | 109.8 (3)  | N1B-C2B-N3B               | 110.6 (3)  |
| N1A-C2A-N6A     | 120.6 (3)  | N6B-C2B-N3B               | 130.0 (3)  |
| N1A-C2A-N3A     | 109.4 (3)  | C2B-N1B-N2B               | 106.0 (3)  |
| N6A-C2A-N3A     | 129.9 (3)  | C1B-N2B-N1B               | 109.9 (3)  |
| N8A-C3A-N7A     | 119.8 (3)  | C1B-N2B-H2B               | 125.1      |
| N8A-C3A-N10A    | 109.7 (3)  | N1B-N2B-H2B               | 125.1      |
| N7A-C3A-N10A    | 130.4 (3)  | C1B-N3B-C2B               | 105.7 (3)  |
| N11A-C4A-N9A    | 126.5 (3)  | C1B-N3B-N5B               | 121.4 (3)  |
| N11A-C4A-N10A   | 125.5 (3)  | C2B-N3B-N5B               | 132.8 (3)  |
| N9A-C4A-N10A    | 108.0 (3)  | C1B-N4B-H4C               | 119 (3)    |
| C2A-N1A-N2A     | 108.6 (3)  | C1B-N4B-H4D               | 111 (3)    |
| C1A-N2A-N1A     | 106.8 (3)  | H4C-N4B-H4D               | 127 (4)    |
| C1A-N3A-C2A     | 105.3 (3)  | N3B-N5B-H5C               | 105 (3)    |
| C1A-N3A-N5A     | 121.0 (3)  | N3B-N5B-H5D               | 105 (3)    |
| C2A-N3A-N5A     | 133.7 (3)  | H5C-N5B-H5D               | 109 (4)    |
| C1A-N4A-H4A     | 115 (3)    | N6B <sup>i</sup> -N6B-C2B | 113.8 (4)  |
|                 |            |                           |            |
| N4-C1-N1-N2     | -1.5 (4)   | N7A-C3A-N8A-N9A           | 177.8 (3)  |
| N5-C1-N1-N2     | 176.2 (4)  | N10A-C3A-N8A-N9A          | 0.2 (4)    |
| C1-N1-N2-N3     | 1.1 (4)    | N11A-C4A-N9A-N8A          | 179.6 (3)  |
| N1-N2-N3-N4     | -0.4 (4)   | N10A-C4A-N9A-N8A          | -1.1 (4)   |
| N1-C1-N4-N3     | 1.2 (4)    | C3A-N8A-N9A-C4A           | 0.6 (4)    |
| N5-C1-N4-N3     | -176.8 (3) | N11A-C4A-N10A-C3A         | -179.5 (3) |
| N2-N3-N4-C1     | -0.5 (4)   | N9A-C4A-N10A-C3A          | 1.2 (4)    |
| N4-C1-N5-N6     | -178.8 (3) | N11A-C4A-N10A-N12A        | -1.2 (6)   |
| N1-C1-N5-N6     | 3.8 (6)    | N9A-C4A-N10A-N12A         | 179.5 (3)  |
| C1-N5-N6-O2     | -176.7 (3) | N8A-C3A-N10A-C4A          | -0.9 (4)   |
| C1-N5-N6-O1     | 4.8 (5)    | N7A-C3A-N10A-C4A          | -178.2 (4) |
| N6A-C2A-N1A-N2A | 179.5 (3)  | N8A-C3A-N10A-N12A         | -178.9 (3) |
| N3A-C2A-N1A-N2A | 0.0 (4)    | N7A-C3A-N10A-N12A         | 3.8 (6)    |

|                  |            |                              |            |
|------------------|------------|------------------------------|------------|
| N4A–C1A–N2A–N1A  | 178.1 (4)  | N6B–C2B–N1B–N2B              | -179.3 (3) |
| N3A–C1A–N2A–N1A  | 0.5 (4)    | N3B–C2B–N1B–N2B              | 1.0 (4)    |
| C2A–N1A–N2A–C1A  | -0.3 (4)   | N4B–C1B–N2B–N1B              | 178.0 (4)  |
| N4A–C1A–N3A–C2A  | -178.2 (3) | N3B–C1B–N2B–N1B              | -0.4 (4)   |
| N2A–C1A–N3A–C2A  | -0.5 (4)   | C2B–N1B–N2B–C1B              | -0.4 (4)   |
| N4A–C1A–N3A–N5A  | -0.2 (5)   | N4B–C1B–N3B–C2B              | -177.4 (3) |
| N2A–C1A–N3A–N5A  | 177.5 (3)  | N2B–C1B–N3B–C2B              | 1.0 (4)    |
| N1A–C2A–N3A–C1A  | 0.3 (4)    | N4B–C1B–N3B–N5B              | 1.5 (5)    |
| N6A–C2A–N3A–C1A  | -179.1 (4) | N2B–C1B–N3B–N5B              | 179.8 (3)  |
| N1A–C2A–N3A–N5A  | -177.3 (3) | N1B–C2B–N3B–C1B              | -1.3 (4)   |
| N6A–C2A–N3A–N5A  | 3.2 (6)    | N6B–C2B–N3B–C1B              | 179.1 (4)  |
| N1A–C2A–N6A–N7A  | 178.8 (3)  | N1B–C2B–N3B–N5B              | -180.0 (3) |
| N3A–C2A–N6A–N7A  | -1.8 (5)   | N6B–C2B–N3B–N5B              | 0.4 (6)    |
| C2A–N6A–N7A–C3A  | 179.3 (3)  | N1B–C2B–N6B–N6B <sup>i</sup> | -178.2 (4) |
| N8A–C3A–N7A–N6A  | -172.0 (3) | N3B–C2B–N6B–N6B <sup>i</sup> | 1.4 (6)    |
| N10A–C3A–N7A–N6A | 5.1 (5)    |                              |            |

Symmetry code: (i)  $-x+1, -y+1, -z+1$ .

### Hydrogen-bond geometry (Å, °) for 6•MeOH •0.5C<sub>4</sub>H<sub>8</sub>N<sub>12</sub>

| <i>D</i> –H··· <i>A</i>             | <i>D</i> –H | H··· <i>A</i> | <i>D</i> ··· <i>A</i> | <i>D</i> –H··· <i>A</i> |
|-------------------------------------|-------------|---------------|-----------------------|-------------------------|
| C2–H2E···N1 <sup>ii</sup>           | 0.98        | 2.67          | 3.460 (5)             | 138                     |
| N1–H1···O1                          | 0.88        | 2.07          | 2.548 (4)             | 113                     |
| N1–H1···N1A <sup>iii</sup>          | 0.88        | 2.12          | 2.945 (4)             | 157                     |
| O3–H3···N5                          | 0.84        | 1.97          | 2.781 (4)             | 161                     |
| N4A–H4A···O2 <sup>iv</sup>          | 0.87 (2)    | 2.63 (3)      | 3.328 (4)             | 138 (4)                 |
| N4A–H4B···N2A <sup>v</sup>          | 0.90 (2)    | 2.12 (2)      | 2.984 (4)             | 162 (4)                 |
| N5A–H5A···N1B                       | 0.91 (2)    | 2.20 (2)      | 3.049 (4)             | 156 (3)                 |
| N5A–H5B···N1A <sup>vi</sup>         | 0.89 (2)    | 2.69 (3)      | 3.416 (4)             | 140 (3)                 |
| N11A–<br>H11A···N12A <sup>vii</sup> | 0.88 (2)    | 2.34 (4)      | 2.990 (5)             | 131 (4)                 |
| N11A–H11B···N2 <sup>viii</sup>      | 0.89 (2)    | 2.66 (4)      | 3.301 (5)             | 130 (3)                 |
| N11A–H11B···N3 <sup>viii</sup>      | 0.89 (2)    | 2.07 (2)      | 2.911 (4)             | 158 (4)                 |
| N12A–H12A···O1 <sup>vii</sup>       | 0.89 (2)    | 2.40 (4)      | 3.017 (5)             | 127 (3)                 |
| N12A–H12A···N4A <sup>vi</sup>       | 0.89 (2)    | 2.60 (3)      | 3.346 (5)             | 142 (3)                 |
| N12A–H12B···N2 <sup>iii</sup>       | 0.90 (2)    | 2.50 (3)      | 3.110 (4)             | 126 (3)                 |
| N12A–H12B···N6A                     | 0.90 (2)    | 2.38 (4)      | 2.907 (5)             | 118 (3)                 |



|                                                       |          |          |           |         |
|-------------------------------------------------------|----------|----------|-----------|---------|
| N2 <i>B</i> –H2 <i>B</i> ···N9 <i>A</i> <sup>ix</sup> | 0.88     | 1.81     | 2.653 (4) | 160     |
| N4 <i>B</i> –H4 <i>C</i> ···O3 <sup>ix</sup>          | 0.88 (2) | 2.00 (2) | 2.867 (4) | 170 (4) |
| N4 <i>B</i> –H4 <i>D</i> ···O2 <sup>ii</sup>          | 0.88 (2) | 2.21 (3) | 3.012 (4) | 151 (4) |
| N4 <i>B</i> –H4 <i>D</i> ···N5 <i>B</i>               | 0.88 (2) | 2.43 (4) | 2.841 (4) | 109 (3) |
| N5 <i>B</i> –H5 <i>C</i> ···N8 <i>A</i> <sup>i</sup>  | 0.89 (2) | 2.39 (3) | 3.113 (5) | 139 (3) |
| N5 <i>B</i> –H5 <i>D</i> ···O3                        | 0.89 (2) | 2.29 (2) | 3.152 (4) | 163 (4) |

Symmetry codes: (i)  $-x+1, -y+1, -z+1$ ; (ii)  $-x+1, -y+2, -z+1$ ; (iii)  $-x+1, -y+2, -z+2$ ; (iv)  $x-1, y-1, z$ ; (v)  $-x, -y+1, -z+2$ ; (vi)  $-x+1, -y+1, -z+2$ ; (vii)  $-x+2, -y+2, -z+2$ ; (viii)  $x+1, y, z$ ; (ix)  $x-1, y, z$ .

**Single Crystal XRD data for 4,4',5,5' tetra-amino-3,3'-azo bis-1,2,4-triazolium di-5-nitro-1,2,3,4-tetrazolate [HTAABTH (CN<sub>5</sub>O<sub>2</sub>)<sub>2</sub>] (7)**

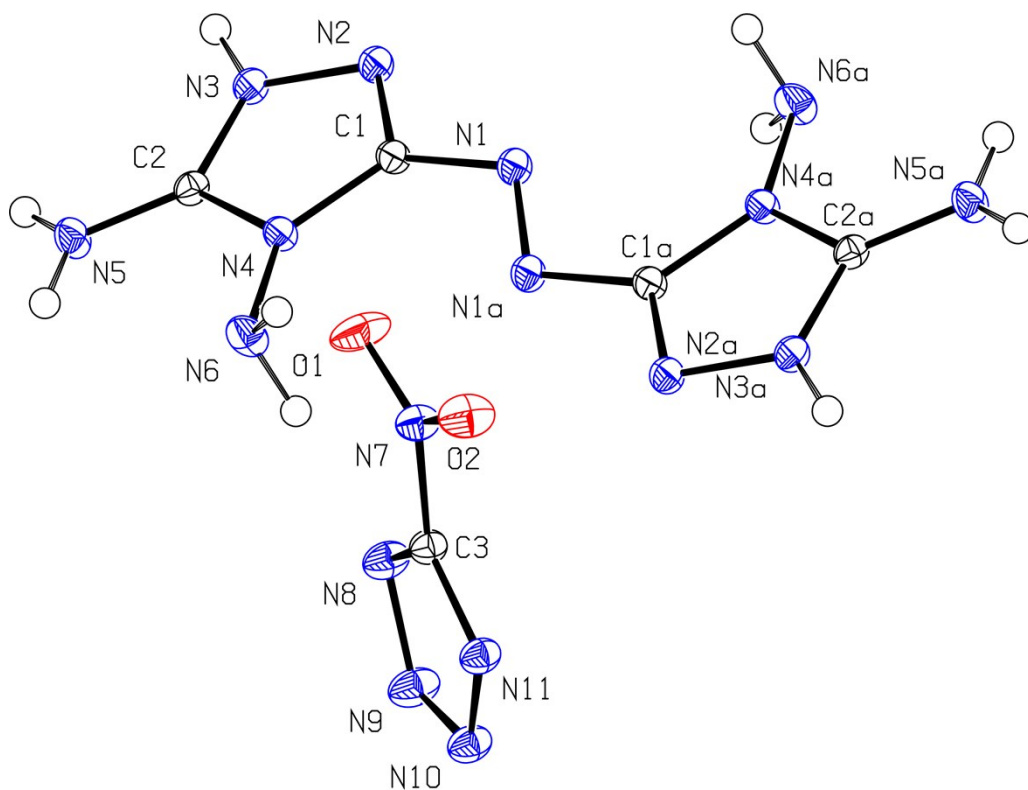

View of the structure of **7**, showing the atom-labelling scheme. Displacement ellipsoids are drawn at the 50% probability level. Symmetry code: (a)  $-x, 1-y, 1-z$ .

**Crystal data**

|                                    |                                                         |
|------------------------------------|---------------------------------------------------------|
| $C_4H_{10}N_{12} \cdot 2(CN_5O_2)$ | $F(000) = 464$                                          |
| $M_r = 454.36$                     | $D_x = 1.762 \text{ Mg m}^{-3}$                         |
| Monoclinic, $P2_1/c$               | Mo $K\alpha$ radiation, $\lambda = 0.71073 \text{ \AA}$ |
| $a = 5.5317 (3) \text{ \AA}$       | Cell parameters from 9945 reflections                   |
| $b = 14.9646 (8) \text{ \AA}$      | $\theta = 2.4\text{--}33.0^\circ$                       |
| $c = 10.6648 (5) \text{ \AA}$      | $\mu = 0.15 \text{ mm}^{-1}$                            |
| $\beta = 104.0683 (18)^\circ$      | $T = 150 \text{ K}$                                     |
| $V = 856.35 (8) \text{ \AA}^3$     | Needle, orange                                          |
| $Z = 2$                            | $0.55 \times 0.23 \times 0.19 \text{ mm}$               |

**Data collection**

|                                         |                            |
|-----------------------------------------|----------------------------|
| Bruker AXS D8 Quest CMOS diffractometer | 28936 measured reflections |
|-----------------------------------------|----------------------------|

|                                                                              |                                                                        |
|------------------------------------------------------------------------------|------------------------------------------------------------------------|
| Radiation source: fine focus sealed tube X-ray source                        | 3287 independent reflections                                           |
| Triumph curved graphite crystal monochromator                                | 2692 reflections with $I > 2\sigma(I)$                                 |
| Detector resolution: 10.4167 pixels mm <sup>-1</sup>                         | $R_{\text{int}} = 0.036$                                               |
| $\omega$ and $\phi$ scans                                                    | $\theta_{\text{max}} = 33.2^\circ$ , $\theta_{\text{min}} = 2.7^\circ$ |
| Absorption correction: multi-scan, <i>SADABS</i> 2016/2, Krause et al., 2015 | $h = -7 \rightarrow 8$                                                 |
| $T_{\text{min}} = 0.718$ , $T_{\text{max}} = 0.747$                          | $k = -23 \rightarrow 23$                                               |
|                                                                              | $l = -16 \rightarrow 16$                                               |

### Refinement

|                                   |                                                                                                                                    |
|-----------------------------------|------------------------------------------------------------------------------------------------------------------------------------|
| Refinement on $F^2$               | Primary atom site location: structure-invariant direct methods                                                                     |
| Least-squares matrix: full        | Secondary atom site location: difference Fourier map                                                                               |
| $R[F^2 > 2\sigma(F^2)] = 0.037$   | Hydrogen site location: difference Fourier map                                                                                     |
| $wR(F^2) = 0.101$                 | All H-atom parameters refined                                                                                                      |
| $S = 1.05$                        | $w = 1/[\sigma^2(F_o^2) + (0.0496P)^2 + 0.3171P]$ where $P = (F_o^2 + 2F_c^2)/3$                                                   |
| 3287 reflections                  | $(\Delta/\sigma)_{\text{max}} = 0.001$                                                                                             |
| 166 parameters                    | $\Delta\rho_{\text{max}} = 0.47 \text{ e } \text{\AA}^{-3}$                                                                        |
| 0 restraints                      | $\Delta\rho_{\text{min}} = -0.27 \text{ e } \text{\AA}^{-3}$                                                                       |
| Extinction coefficient: 0.007 (2) | Extinction correction: <i>SHELXL2018/3</i> (Sheldrick, 2018),<br>$F_c^* = kF_c[1 + 0.001x F_c^2 \lambda^3 / \sin(2\theta)]^{-1/4}$ |

### Geometric parameters ( $\text{\AA}$ , $^\circ$ ) for 7

|                    |             |           |             |
|--------------------|-------------|-----------|-------------|
| C1–N2              | 1.3086 (11) | N3–H3     | 0.897 (16)  |
| C1–N4              | 1.3849 (11) | N4–N6     | 1.4033 (11) |
| C1–N1              | 1.3860 (11) | N5–H5A    | 0.880 (18)  |
| C2–N5              | 1.3141 (12) | N5–H5B    | 0.869 (17)  |
| C2–N3              | 1.3425 (12) | N6–H6A    | 0.920 (17)  |
| C2–N4              | 1.3561 (11) | N6–H6B    | 0.933 (19)  |
| C3–N8              | 1.3238 (12) | N7–O1     | 1.2243 (11) |
| C3–N11             | 1.3266 (11) | N7–O2     | 1.2268 (11) |
| C3–N7              | 1.4397 (12) | N8–N9     | 1.3429 (12) |
| N1–N1 <sup>1</sup> | 1.2723 (15) | N9–N10    | 1.3265 (12) |
| N2–N3              | 1.3663 (11) | N10–N11   | 1.3419 (11) |
|                    |             |           |             |
| N2–C1–N4           | 111.18 (7)  | C2–N4–N6  | 121.00 (8)  |
| N2–C1–N1           | 119.25 (8)  | C1–N4–N6  | 132.46 (7)  |
| N4–C1–N1           | 129.56 (8)  | C2–N5–H5A | 119.3 (11)  |

|                          |              |               |              |
|--------------------------|--------------|---------------|--------------|
| N5–C2–N3                 | 129.19 (8)   | C2–N5–H5B     | 120.4 (11)   |
| N5–C2–N4                 | 124.98 (8)   | H5A–N5–H5B    | 120.1 (16)   |
| N3–C2–N4                 | 105.83 (8)   | N4–N6–H6A     | 107.7 (10)   |
| N8–C3–N11                | 114.51 (8)   | N4–N6–H6B     | 108.2 (11)   |
| N8–C3–N7                 | 121.62 (8)   | H6A–N6–H6B    | 105.8 (15)   |
| N11–C3–N7                | 123.87 (8)   | O1–N7–O2      | 124.83 (9)   |
| N1 <sup>i</sup> –N1–C1   | 113.49 (9)   | O1–N7–C3      | 117.47 (8)   |
| C1–N2–N3                 | 104.55 (7)   | O2–N7–C3      | 117.70 (8)   |
| C2–N3–N2                 | 111.90 (7)   | C3–N8–N9      | 103.37 (8)   |
| C2–N3–H3                 | 128.2 (11)   | N10–N9–N8     | 109.20 (8)   |
| N2–N3–H3                 | 119.6 (11)   | N9–N10–N11    | 110.09 (8)   |
| C2–N4–C1                 | 106.48 (7)   | C3–N11–N10    | 102.82 (7)   |
|                          |              |               |              |
| N2–C1–N1–N1 <sup>i</sup> | -167.60 (10) | N2–C1–N4–N6   | -174.78 (9)  |
| N4–C1–N1–N1 <sup>i</sup> | 11.43 (16)   | N1–C1–N4–N6   | 6.13 (17)    |
| N4–C1–N2–N3              | -2.19 (10)   | N8–C3–N7–O1   | 4.50 (14)    |
| N1–C1–N2–N3              | 177.01 (8)   | N11–C3–N7–O1  | -175.63 (10) |
| N5–C2–N3–N2              | -179.55 (9)  | N8–C3–N7–O2   | -175.41 (9)  |
| N4–C2–N3–N2              | 0.47 (10)    | N11–C3–N7–O2  | 4.46 (14)    |
| C1–N2–N3–C2              | 1.07 (10)    | N11–C3–N8–N9  | -0.24 (11)   |
| N5–C2–N4–C1              | 178.28 (9)   | N7–C3–N8–N9   | 179.65 (9)   |
| N3–C2–N4–C1              | -1.74 (10)   | C3–N8–N9–N10  | 0.32 (11)    |
| N5–C2–N4–N6              | -4.02 (14)   | N8–N9–N10–N11 | -0.30 (12)   |
| N3–C2–N4–N6              | 175.96 (8)   | N8–C3–N11–N10 | 0.06 (11)    |
| N2–C1–N4–C2              | 2.55 (10)    | N7–C3–N11–N10 | -179.82 (9)  |
| N1–C1–N4–C2              | -176.54 (9)  | N9–N10–N11–C3 | 0.15 (11)    |

Symmetry code: (i)  $-x, -y+1, -z+1$ .

### Hydrogen-bond geometry (Å, °) for 7

| $D-H\cdots A$                               | $D-H$      | $H\cdots A$ | $D\cdots A$ | $D-H\cdots A$ |
|---------------------------------------------|------------|-------------|-------------|---------------|
| N3–H3 <sup>ii</sup> ···N8 <sup>ii</sup>     | 0.897 (16) | 1.928 (17)  | 2.8207 (11) | 173.3 (15)    |
| N5–H5A <sup>iii</sup> ···N10 <sup>iii</sup> | 0.880 (18) | 2.099 (18)  | 2.9493 (12) | 162.1 (15)    |
| N5–H5B <sup>iv</sup> ···N9 <sup>iv</sup>    | 0.869 (17) | 2.158 (17)  | 2.9130 (12) | 145.1 (15)    |
| N6–H6A <sup>v</sup> ···N11 <sup>v</sup>     | 0.920 (17) | 2.333 (17)  | 3.2429 (12) | 170.0 (14)    |
| N6–H6B <sup>v</sup> ···O2 <sup>v</sup>      | 0.933 (19) | 2.415 (17)  | 2.8922 (11) | 111.7 (13)    |

Symmetry codes: (ii)  $-x+1, -y+1, -z+2$ ; (iii)  $-x+2, y+1/2, -z+3/2$ ; (iv)  $-x+2, -y+1, -z+2$ ; (v)  $-x+1, -y+1, -z+1$ .

## References

1. R. G. Child. *J. Heterocycl. Chem.* 1965, **2**, 98.
2. T. M. Klapötke, J. Stierstorfer. *Helv. Chimica Acta.* 2007, 90(11), 2132.
3. T. M. Klapötke, D. G. Piercey, N. Meheta, K. D. Oyler, M. Jorgensen, S. Lenahan, J. S. Salan, J. W. Fronabarger, M. D. Williams. *Zeit. Anorg. Allg. Chem.* 2013, **639** (5), 681-688.
4. Description - ElectraSyn 2.0 Package. Can be found under: <https://www.ika.com/en/Products-Lab-Eq/Electrochemistry-Kit-csp-516/ElectraSyn-20-Package-cpdt-20008980/>
5. J. L. Dempsey. *J. Chem. Educ.* 2017, **95** (2), 197.
6. Bruker. Apex3 v2018.7-2, Saint V8.38A, Bruker AXS Inc.: Madison (WI), USA 2018.
7. L. Krause., R. Herbst-Irmer, G. M. Sheldrick, D. Stalke. *J. Appl. Cryst.* 2015, **48**, 3-10.
8. G. M. Sheldrick. *Acta Crystallogr A.* 2008, **64**(1), 112–122.
9. G. M. Sheldrick. *Acta Crystallogr Sect C Struct. Chem.* 2015, **71**(1), 3–8.
